# Supplementary material
Source: MDPI journal article supplement (https://www.mdpi.com/search?q=marinedrugs-17-00220)
Supplement: s001 [file marinedrugs-17-00220-s001.pdf]

## Supplementary material

# Marine fungi from the sponge *Grantia compressa*: biodiversity, chemodiversity and biotechnological potential

Elena Bovio <sup>1,5</sup>, Laura Garzoli <sup>1</sup>, Anna Poli <sup>1</sup>, Anna Lukanini <sup>2</sup>, Pietro Villa <sup>3</sup>, Rosario Musumeci <sup>3</sup>, Grace P. McCormack <sup>4</sup>, Clementina E. Cocuzza <sup>3</sup>, Giorgio Gribaudo <sup>2</sup>, Mohamed Mehiri <sup>5,\*</sup> and Giovanna C. Varese <sup>1,\*</sup>

<sup>1</sup> Mycotheca Universitatis Taurinensis, Department of Life Sciences and Systems Biology, University of Turin, Viale Mattioli 25, 10125 Turin (Italy); [elena.bovio@unito.it](mailto:elena.bovio@unito.it), [laura.garzoli@unito.it](mailto:laura.garzoli@unito.it), [anna.poli@unito.it](mailto:anna.poli@unito.it), [cristina.varese@unito.it](mailto:cristina.varese@unito.it)

<sup>2</sup> Laboratory of Microbiology and Virology, Department of Life Sciences and Systems Biology, University of Turin, Via Accademia Albertina 13, 10123 Turin (Italy); [anna.lukanini@unito.it](mailto:anna.lukanini@unito.it), [giorgio.gribaudo@unito.it](mailto:giorgio.gribaudo@unito.it)

<sup>3</sup> Laboratory of Clinical Microbiology and Virology, Department of Medicine, University of Milano-Bicocca, via Cadore 48, 20900 Monza (Italy); [p.villa18@campus.unimib.it](mailto:p.villa18@campus.unimib.it), [rosario.musumeci@unimib.it](mailto:rosario.musumeci@unimib.it), [clementina.cocuzza@unimib.it](mailto:clementina.cocuzza@unimib.it)

<sup>4</sup> Zoology, Ryan Institute, School of Natural Sciences, National University of Ireland Galway, University Road, Galway (Ireland); [grace.mccormack@nuigalway.ie](mailto:grace.mccormack@nuigalway.ie)

<sup>5</sup> University Nice Côte d'Azur, CNRS, Nice Institute of Chemistry, UMR 7272, Marine Natural Products Team, Nice 60103 (France); [mohamed.mehiri@unice.fr](mailto:mohamed.mehiri@unice.fr)

\* Correspondence: [mohamed.mehiri@unice.fr](mailto:mohamed.mehiri@unice.fr); Tel.: +33-492-076-154; [cristina.varese@unito.it](mailto:cristina.varese@unito.it); Tel.: +39-011-670-5964

### Table of Contents

|                    |                                                                                                                                       |
|--------------------|---------------------------------------------------------------------------------------------------------------------------------------|
| <b>Table S1.</b>   | Gene loci sequenced, primers for molecular analysis and PCR programs.                                                                 |
| <b>Table S2.</b>   | List of taxa used for the phylogenetic analysis of <i>Emericellopsis</i> spp. and their GenBank accession number                      |
| <b>Table S3.</b>   | List of fungal strains isolated from <i>G. compressa</i> with Mycotheca Universitatis Taurinensis (MUT) and GenBank accession number. |
| <b>Figure S1.</b>  | <sup>1</sup> H NMR spectrum of echinulin ( <b>1</b> ) in CDCl <sub>3</sub> at 500 MHz.                                                |
| <b>Figure S2.</b>  | <sup>13</sup> C NMR spectrum of echinulin ( <b>1</b> ) in CDCl <sub>3</sub> at 125 MHz.                                               |
| <b>Figure S3.</b>  | <sup>1</sup> H NMR spectrum of neoechinulin A ( <b>2</b> ) in CDCl <sub>3</sub> at 500 MHz.                                           |
| <b>Figure S4.</b>  | <sup>13</sup> C NMR spectrum of neoechinulin A ( <b>2</b> ) in CDCl <sub>3</sub> at 125 MHz.                                          |
| <b>Figure S5.</b>  | <sup>1</sup> H NMR spectrum of physcion ( <b>3</b> ) in CDCl <sub>3</sub> at 500 MHz.                                                 |
| <b>Figure S6.</b>  | <sup>13</sup> C NMR spectrum of physcion ( <b>3</b> ) in CDCl <sub>3</sub> at 125 MHz.                                                |
| <b>Figure S7.</b>  | <sup>1</sup> H NMR spectrum of dihydroauroglaucin ( <b>4</b> ) in CDCl <sub>3</sub> at 500 MHz.                                       |
| <b>Figure S8.</b>  | <sup>13</sup> C NMR spectrum of dihydroauroglaucin ( <b>4</b> ) in CDCl <sub>3</sub> at 125 MHz.                                      |
| <b>Figure S9.</b>  | <sup>1</sup> H NMR spectrum of flavoglaucin ( <b>5</b> ) in CDCl <sub>3</sub> at 500 MHz.                                             |
| <b>Figure S10.</b> | <sup>13</sup> C NMR spectrum of flavoglaucin ( <b>5</b> ) in CDCl <sub>3</sub> at 125 MHz.                                            |
| <b>Figure S11.</b> | <sup>1</sup> H NMR spectrum of isodihydroauroglaucin ( <b>6</b> ) in CDCl <sub>3</sub> at 500 MHz.                                    |
| <b>Figure S12.</b> | <sup>13</sup> C NMR spectrum of isodihydroauroglaucin ( <b>6</b> ) in CDCl <sub>3</sub> at 125 MHz.                                   |
| <b>Figure S13.</b> | <sup>1</sup> H NMR spectrum of neoechinulin D ( <b>7</b> ) in CDCl <sub>3</sub> at 500 MHz.                                           |
| <b>Figure S14.</b> | <sup>13</sup> C NMR spectrum of neoechinulin D ( <b>7</b> ) in CDCl <sub>3</sub> at 125 MHz.                                          |
| <b>Figure S15.</b> | <sup>1</sup> H NMR spectrum of asperflavin ( <b>8</b> ) in CD <sub>3</sub> OD at 500 MHz.                                             |
| <b>Figure S16.</b> | <sup>13</sup> C NMR spectrum of asperflavin ( <b>8</b> ) in CD <sub>3</sub> OD at 125 MHz.                                            |

- Figure S17.**  $^1\text{H}$  NMR spectrum of cinnalutein (**9**) in  $\text{CD}_3\text{OD}$  at 500 MHz.
- Figure S18.**  $^{13}\text{C}$  NMR spectrum of cinnalutein (**9**) in  $\text{CD}_3\text{OD}$  at 125 MHz.
- Figure S19.**  $^1\text{H}$  NMR spectrum of cyclo-L-Trp- L-Ala (**10**) in  $\text{CD}_3\text{OD}$  at 500 MHz.
- Figure S20.**  $^{13}\text{C}$  NMR spectrum of cyclo-L-Trp- L-Ala (**10**) in  $\text{CD}_3\text{OD}$  at 125 MHz.
- Figure S21.** Bayesian phylogram of the genus *Emericellopsis* based on a combined dataset of ITS and beta tubulin partial sequences. MUT 2273 and MUT 2274 were identified as *Emericellopsis pallida*. Branch numbers indicate BPP values.
- Table S4.** Effect of different growth conditions on the HPLC-UV 280 nm chemical fingerprint of fungi, expressed as classes 1, 2, 3 and 4 at the increasing of the metabolic diversity. Exclusive peaks of each condition indicated in parenthesis. The changing in colours from dark to light blue and white indicated the increasing of the metabolic diversity.
- Table S5.** Effect of different growth conditions on the development of the fungus (-, +, ++, +++); production of exudates (*e*), soluble pigments (*s*) and high sporulation (*h*); fungal-bacteria interaction as antagonistic response (*a*), predominance of the fungus (*p*) or complete inhibition of the bacterial growth (*n*). The changing in colours from dark to light blue and white, underlined the increasing of growth classes.

**Table S1.** Gene loci sequenced, primers for molecular analysis and PCR programs.

| Fungi                                                               | Gene loci and DNA regions sequenced <sup>a</sup> | Primers (Forward and Reverse) | PCR amplification Conditions                                                           | References for primers |
|---------------------------------------------------------------------|--------------------------------------------------|-------------------------------|----------------------------------------------------------------------------------------|------------------------|
| <i>Penicillium, Emericellopsis</i>                                  | TUB                                              | BT-2a and BT-2b               | 94 °C: 4 min, (94 °C: 35 sec, 58 °C: 35 sec, 72 °C: 50 sec) × 35 cycles; 72 °C: 5 min  | [92]                   |
| <i>Cladosporium</i>                                                 | ACT                                              | ACT-512F and ACT-783R         | 94 °C: 8 min, (94 °C: 15 sec, 61 °C: 20 sec, 72 °C: 40 sec) × 35 cycles; 72 °C: 10 min | [93]                   |
| Sterile mycelia and taxa for which no specific primers are required | ITS                                              | ITS1 and ITS4                 | 95 °C: 5 min, (95 °C:40 s, 55 °C: 50 s, 72 °C: 50 sec) × 35 cycles; 72 °C: 8 min       | [94]                   |
| Sterile mycelia                                                     | LSU                                              | LROR and LR7                  | 95 °C: 5 min, (95 °C: 1 min, 50 °C: 1 min, 72 °C: 2 min) × 35 cycles; 72 °C: 10 min    | [95]                   |

<sup>a</sup> TUB: partial beta-tubulin gene; ACT: partial actin gene; ITS: internal transcribed spacer regions and intervening 5.8S nrRNA gene; LSU: partial nuclear ribosomal DNA large subunit.

**Table S2.** List of taxa used for the phylogenetic analysis of *Emericellopsis* spp. and their GenBank accession number.

| Species                              | Strain      | GenBank accession number |          |
|--------------------------------------|-------------|--------------------------|----------|
|                                      |             | ITS                      | TUB      |
| <i>Acremonium exuviarum</i>          | UAMH 9995   | AY882946                 | AY882947 |
| <i>Acremonium fuci</i>               | CBS 112868  | AY632653                 | AY632690 |
| <i>Acremonium potronii</i>           | CBS 379.70F | AY632655                 | AY632691 |
| <i>Acremonium sclerotigenum</i>      | A130        | KC987166                 | KC987128 |
| <i>Emericellopsis alkalina</i>       | CBS 127350  | KC987171                 | KC987133 |
| <i>Emericellopsis alkalina</i>       | CBS 120044  | KC987169                 | KC987131 |
| <i>Emericellopsis alkalina</i>       | CBS 120049  | KC987170                 | KC987132 |
| <i>Emericellopsis donezkii</i>       | CBS 489.71  | AY632658                 | AY632674 |
| <i>Emericellopsis glabra</i>         | A.R. 3614   | HM484860                 | HM484879 |
| <i>Emericellopsis humicola</i>       | CBS 180.56  | AY632659                 | AY632675 |
| <i>Emericellopsis maritima</i>       | CBS 491.71  | KC987175                 | KC987137 |
| <i>Emericellopsis microspora</i>     | CBS 380.62  | AY632663                 | AY632679 |
| <i>Emericellopsis minima</i>         | CBS 190.55  | KC987173                 | KC987135 |
| <i>Emericellopsis minima</i>         | CBS 871.68  | KC987174                 | KC987136 |
| <i>Emericellopsis pallida</i>        | CBS 490.71  | KC987176                 | KC987138 |
| <i>Emericellopsis pallida</i>        | CBS 624.73  | AY632667                 | AY632683 |
| <i>Emericellopsis robusta</i>        | CBS 489.73  | AY632664                 | AY632680 |
| <i>Emericellopsis salmosynnemata</i> | CBS 382.62  | AY632666                 | AY632682 |
| <i>Emericellopsis stolckiae</i>      | CBS 159.71  | AY632668                 | AY632684 |
| <i>Emericellopsis synnematicola</i>  | CBS 176.60  | AY632665                 | AY632681 |
| <i>Emericellopsis terricola</i>      | CBS 229.59  | AY632662                 | AY632678 |

**Table S3.** List of fungal strains isolated from *G. compressa* with Mycotheca Universitatis Taurinensis (MUT) and GenBank accession number.

| MUT CODE | Taxa                                      | GenBank accession number            |          |          |          |
|----------|-------------------------------------------|-------------------------------------|----------|----------|----------|
|          |                                           | ITS                                 | LSU      | ACT      | TUB      |
| 2282     | <i>Coprinellus</i> sp.                    | MF140467                            | MF140459 |          |          |
| 2332     |                                           | MF140469                            | MF140461 |          |          |
| 2288     | <i>Ceriporia lacerata</i>                 | MF125292                            | MF125289 |          |          |
| 2307     | <i>Cladosporium allacinum</i>             |                                     |          |          | -        |
| 2313     |                                           |                                     |          | MH383514 |          |
| 2314     |                                           | <i>Cladosporium cladosporioides</i> |          |          | MH383515 |
| 2315     | <i>Cladosporium pseudocladosporioides</i> |                                     |          | MH383516 |          |
| 2273     | <i>Emericellopsis pallida</i>             | MH399734                            | MG845233 |          | MH480660 |
| 2274     | <i>Emericellopsis pallida</i>             | MH399735                            | MG845234 |          | MH480663 |
| 2316     | <i>Eurotium chevalieri</i>                | MH399736                            |          |          | MH383517 |
| 2334     | <i>Euthypella scoparia</i>                | MH399739                            | MG845235 |          |          |
| 2317     | <i>Fusarium solani</i>                    | MH399737                            |          |          |          |
| 2321     | <i>Penicillium chrysogenum</i>            |                                     |          |          | MH383518 |
| 2328     | <i>Penicillium oxalicum</i>               | MH399738                            |          |          |          |
| 2322     | <i>Penicillium paneum</i>                 |                                     |          |          | MH383519 |
| 2326     |                                           |                                     |          |          | MH383520 |
| 2331     | <i>Psathyrella candolleana</i>            | MF125293                            | MF125290 |          |          |
| 2415     | <i>Rhodotorula mucilaginosa</i>           | MF423718                            |          |          |          |
| -        | <i>Tetracladium</i> sp.                   |                                     |          |          |          |
| 2410     | <i>Tolyposcladium cylindrosporium</i>     | MH399740                            |          |          |          |
| 2413     |                                           | MH399741                            |          |          |          |

#### Echinulin (1):

<sup>1</sup>H NMR (500 MHz, CDCl<sub>3</sub>,  $\delta$ /ppm, J/Hz): 8.05 (1H, s, 1-NH), 7.13 (1H, s, H-4), 6.80 (1H, s, H-6), 6.10 (1H, dd,  $J$  = 17.3, 10.6, H-2'), 5.42 (1H, t,  $J$  = 6.8, H-2'''), 5.35 (1H, m, H-2''), 5.14 (2H, m, H-3'), 4.41 (1H, m, H-9), 4.10 (1H, q,  $J$  = 6.8, H-12), 3.66 (1H, dd,  $J$  = 14.6, 3.2, H-8), 3.53 (2H, d,  $J$  = 7.1, H-1'''), 3.39 (2H, d,  $J$  = 7.1, H-1''), 3.18 (1H, dd,  $J$  = 14.6, 11.8, H-8), 1.87 (3H, s, CH<sub>3</sub>-3'''), 1.81 (3H, s, CH<sub>3</sub>-3'''), 1.74 (3H, overlapped, CH<sub>3</sub>-3''), 1.51 (3H, overlapped, CH<sub>3</sub>-1').

<sup>13</sup>C NMR (125 MHz, CDCl<sub>3</sub>,  $\delta$ /ppm): 168.6 (C-10), 167.9 (C-13), 145.9 (C-2'), 141.5 (C-2), 134.0 (C-5), 133.1 (C-3'''), 132.4 (C-7a), 131.7 (C-3''), 129.1 (C-3a), 124.6 (C-2''), 123.5 (C-7), 123.0 (C-2'''), 123.0 (C-6), 115.2 (C-4), 112.5 (C-3'), 104.2 (C-3), 54.7 (C-9), 51.0 (C-12), 39.1 (C-1'), 34.7 (C-1''), 31.5 (C-1'''), 29.6 (C-8), 28.1 (CH<sub>3</sub>-1'), 27.9 (CH<sub>3</sub>-1'), 25.9 (CH<sub>3</sub>-3'''), 25.9 (CH<sub>3</sub>-3''), 20.0 (C-15), 18.1 (CH<sub>3</sub>-3'''), 18.1 (CH<sub>3</sub>-3'').

LR-ESI-MS:  $m/z$  462.2 [M + H]<sup>+</sup>.

#### Neoechinulin A (2):

<sup>1</sup>H NMR (500 MHz, CDCl<sub>3</sub>,  $\delta$ /ppm, J/Hz): 8.33 (1H, s, 1-NH), 7.36 (1H, d,  $J$  = 8.0, H-4), 7.27 (1H, d,  $J$  = 7.5, H-7), 7.18 (1H, m, H-6), 7.07 (1H, m, H-5), 6.08 (1H, dd,  $J$  = 17.4, 10.6, H-2'), 5.21 (2H, m, H-3'), 4.22 (1H, q,  $J$  = 6.0, H-12), 1.60 (6H, overlapped, CH<sub>3</sub>-1'), 1.53 (3H, d,  $J$  = 6.0, CH<sub>3</sub>-12).

<sup>13</sup>C NMR (125 MHz, CDCl<sub>3</sub>,  $\delta$ /ppm): 165.8 (C-13), 160.0 (C-10), 144.4 (C-2'), 143.9 (C-2), 134.4 (C-7a), 126.2 (C-3a), 124.5 (C-9), 122.5 (C-6), 121.2 (C-5), 119.0 (C-4), 113.5 (C-8), 112.1 (C-7), 111.4 (C-3'), 103.1 (C-3), 51.8 (C-12), 39.4 (C-1'), 27.5 (CH<sub>3</sub>-1'), 21.0 (CH<sub>3</sub>-12).

LR-ESI-MS:  $m/z$  324.1 [M + H]<sup>+</sup>.

#### Physcion (3):

<sup>1</sup>H NMR (500 MHz, CDCl<sub>3</sub>,  $\delta$ /ppm, J/Hz): 12.31 (1H, s, 5-OH), 12.11 (1H, s, 4-OH), 7.63 (1H, s, H-1), 7.37 (1H, d,  $J$  = 2.0, H-8), 7.08 (1H, s, H-3), 6.69 (1H, d,  $J$  = 2.0, H-6), 3.94 (3H, s, 7-OCH<sub>3</sub>), 2.45 (3H, s, 2-CH<sub>3</sub>).

<sup>13</sup>C NMR (125 MHz, CDCl<sub>3</sub>, δ/ppm): 190.9 (C-10), 182.2 (C-9), 166.7 (C-7), 165.3 (C-5), 162.6 (C-4), 148.6 (C-2), 135.4 (C-8a), 133.4 (C-1a), 124.7 (C-3), 121.4 (C-1), 113.8 (C-4a), 110.4 (C-5a), 108.4 (C-6), 106.9 (C-8), 56.2 (3-OCH<sub>3</sub>), 22.3 (2-CH<sub>3</sub>).

LR-ESI-MS: *m/z* 285.1 [M + H]<sup>+</sup>.

**Dihydroauroglaucin (4):**

<sup>1</sup>H NMR (500 MHz, CDCl<sub>3</sub>, δ/ppm, *J*/Hz): 11.8 (1H, s, 5-OH), 10.01 (1H, s, 1-CHO), 6.90 (1H, s, H-4), 6.56 (1H, d, *J* = 15.9, H-1'), 6.44 (1H, ddd, *J* = 15.9, 10.2, 0.6, H-2'), 6.27 (1H, ddt, *J* = 15.1, 10.2, 1.4, H-3'), 5.89 (dt, *J* = 15.0, 7.0 Hz, H-4'), 5.30 (1H, m, H-2''), 4.93 (1H, 2-OH), 3.31 (2H, d, *J* = 7.5, H-1''), 2.15 (2H, m, H-5'), 1.76 (3H, s, H-4''), 1.70 (3H, s, H-5''), 1.47 (2H, m, H-6'), 0.94 (3H, t, *J* = 6.0, H-7').

<sup>13</sup>C NMR (125 MHz, CDCl<sub>3</sub>, δ/ppm): 196.4 (1-CHO), 155.4 (C-5), 145.2 (C-2), 140.1 (C-4'), 139.1 (C-2'), 134.2 (C-3''), 130.6 (C-3), 129.7 (C-6), 125.3 (C-4), 124.2 (C-2''), 121.1 (C-3'), 119.5 (C-1'), 117.2 (C-1), 35.0 (C-5'), 27.4 (C-1''), 26.0 (C-4''), 22.4 (C-6'), 17.9 (C-5''), 13.9 (C-7').

LR-ESI-MS: *m/z* 301.1 [M + H]<sup>+</sup>.

**Flavoglaucin (5):**

<sup>1</sup>H NMR (500 MHz, CDCl<sub>3</sub>, δ/ppm, *J*/Hz): 11.91 (1H, s, 5-OH), 10.25 (1H, s, 1-CHO), 6.89 (1H, s, H-4), 5.28 (1H, m, H-2''), 4.43 (1H, 2-OH), 3.29 (2H, d, *J* = 7.5, H-1''), 2.88 (2H, t, *J* = 7.5, H-1'), 1.76 (3H, s, H-4''), 1.69 (3H, s, H-5''), 1.57 (2H, m, H-2'), 1.40 (2H, m, H-3'), 1.27 (6H, overlapped, H-4', 5', 6'), 0.88 (3H, t, *J* = 6.0, H-7').

<sup>13</sup>C NMR (125 MHz, CDCl<sub>3</sub>, δ/ppm): 195.7 (1-CHO), 155.9 (C-5), 145.1 (C-2), 134.0 (C-3''), 128.7 (C-3, C-6), 125.8 (C-4), 121.3 (C-2''), 117.5 (C-1), 32.2 (C-5'), 31.9 (C-4'), 29.7 (C-3'), 29.3 (C-2'), 27.1 (C-1''), 25.9 (C-4''), 24.1 (C-1'), 22.8 (C-6'), 17.9 (C-5'), 14.2 (C-7').

LR-ESI-MS: *m/z* 305.1 [M + H]<sup>+</sup>.

**Isodihydroauroglaucin (6):**

<sup>1</sup>H NMR (500 MHz, CDCl<sub>3</sub>, δ/ppm, *J*/Hz): 11.93 (1H, s, 5-OH), 10.23 (1H, s, 1-CHO), 6.90 (1H, s, H-4), 6.01 (1H, overlapped, H-4'), 5.99 (1H, overlapped, H-5'), 5.59 (1H, overlapped, H-3'), 5.59 (1H, overlapped, H-6'), 5.30 (1H, m, H-2''), 4.43 (1H, 2-OH), 3.29 (2H, d, *J* = 7.5, H-1''), 2.98 (2H, t, *J* = 7.5, H-1'), 2.34 (2H, m, H-2'), 1.76 (3H, s, H-4''), 1.73 (3H, d, *J* = 6.0, H-7'), 1.69 (3H, s, H-5'').

<sup>13</sup>C NMR (125 MHz, CDCl<sub>3</sub>, δ/ppm): 195.5 (1-CHO), 156.0 (C-5), 145.2 (C-2), 134.1 (C-3''), 132.2 (C-5'), 131.3 (C-6'), 129.5 (C-4'), 129.1 (C-6), 128.5 (C-3'), 127.5 (C-3), 126.0 (C-4), 117.4 (C-1), 34.4 (C-2'), 29.9 (C-2''), 27.2 (C-1''), 26.0 (C-4''), 24.3 (C-1'), 18.2 (C-5''), 17.9 (C-7').

LR-ESI-MS: *m/z* 301.1 [M + H]<sup>+</sup>.

**Neoechinulin D (7):**

<sup>1</sup>H NMR (500 MHz, CDCl<sub>3</sub>, δ/ppm, *J*/Hz): 8.18 (1H, s, 1-NH), 7.16 (1H, m, H-4), 7.21 (1H, s, H-7), 7.00 (1H, dd, *J* = 8.0, 1.5, H-5), 6.05 (1H, dd, *J* = 17.4, 10.6, H-2'), 5.23 (1H, m, H-2''), 5.21 (2H, m, H-3'), 4.29 (1H, q, *J* = 6.0, H-12), 3.43 (2H, d, *J* = 7.5, H-1''), 1.76 (3H, s, H-4''), 1.74 (3H, s, H-5''), 1.60 (6H, overlapped, CH<sub>3</sub>-1'), 1.51 (3H, d, *J* = 6.0, CH<sub>3</sub>-12).

<sup>13</sup>C NMR (125 MHz, CDCl<sub>3</sub>, δ/ppm): 165.7 (C-13), 160.0 (C-10), 144.5 (C-2'), 143.4 (C-2), 124.3 (C-6), 123.8 (C-7a), 122.4 (C-3''), 124.3 (C-3a), 123.8 (C-9), 122.4 (C-5), 118.9 (C-4), 113.4 (C-8), 112.4 (C-7), 110.6 (C-3'), 103.2 (C-3), 51.8 (C-12), 39.4 (C-1'), 27.6 (CH<sub>3</sub>-1'), 27.5 (CH<sub>3</sub>-1'), 25.9 (CH<sub>3</sub>-4''), 21.1 (CH<sub>3</sub>-12), 18.0 (CH<sub>3</sub>-5'').

LR-ESI-MS: *m/z* 392.2 [M + H]<sup>+</sup>.

**Asperflavin (8):**

<sup>1</sup>H NMR (500 MHz, CD<sub>3</sub>OD, δ/ppm, *J*/Hz): 6.81 (1H, s, H-10), 6.54 (1H, d, *J* = 2.0, H-5), 6.45 (1H, d, *J* = 2.0, H-7), 3.92 (3H, s, CH<sub>3</sub>O-8), 3.01 (2H, s, H-4), 2.79 (1H, d, *J* = 16.9, H-2a), 2.79 (1H, d, *J* = 16.9, H-2b), 1.37 (3H, s, CH<sub>3</sub>-3).

<sup>13</sup>C NMR (125 MHz, CD<sub>3</sub>OD, δ/ppm): 204.5 (C-1), 166.9 (C-9), 163.3 (C-8), 162.4 (C-6), 144.1 (C-10a), 138.8 (C-4a), 118.1 (C-10), 110.7 (C-8a), 103.8 (C-9a), 99.3 (C-5), 97.8 (C-7), 71.7 (C-3), 56.7 (CH<sub>3</sub>O-8), 52.9 (C-2), 44.6 (C-4), 29.3 (CH<sub>3</sub>-3).

LR-ESI-MS: *m/z* 287.1 [M - H]<sup>-</sup>.

**Cinnalutein (9):**

<sup>1</sup>H NMR (500 MHz, CD<sub>3</sub>OD, δ/ppm, *J*/Hz): 7.51 (1H, s, H-4), 7.22 (1H, s, H-5), 6.94 (1H, s, H-7), 3.94 (3H, s, 6-OCH<sub>3</sub>), 2.43 (3H, s, 3-COCH<sub>3</sub>).

$^{13}\text{C}$  NMR (125 MHz,  $\text{CD}_3\text{OD}$ ,  $\delta/\text{ppm}$ ): 188.3 (C-9), 184.1 (C-10), 174.3 (-COOH), 170.2 (C-1 or C-8), 165.4 (C-6), 159.2 (C-1 or C-8), 142.0 (C-2 or C3), 139.5 (C-10a), 138.8 (C-4a), 131.9 (C-2 or C-3), 121.1 (C-4), 116.2 (C-9a), 109.5 (C-8a), 105.9 (C-5), 102.9 (C-7), 56.7 (1C, 6-OCH<sub>3</sub>), 20.2 (1C, 3-COCH<sub>3</sub>).

LR-ESI-MS:  $m/z$  327.1 [M + H]<sup>-</sup>.

**Cyclo-L-Trp- L-Ala (10):**

$^1\text{H}$  NMR (500 MHz,  $\text{CDCl}_3$ ,  $\delta/\text{ppm}$ ,  $J/\text{Hz}$ ): 8.52 (1H, s, 1-NH), 7.60 (1H, d,  $J = 8.0$ , H-4), 7.32 (1H, d,  $J = 8$ , H-7), 7.06 (2H, m, H-2, H-6), 6.99 (1H, t,  $J = 8$ , H-5), 4.27 (1H, t,  $J = 4.5$ , H-9), 3.59 (1H, q,  $J = 7.0$ , H-12), 3.45 (1H, dd,  $J = 14.9, 3.9$ , H-8), 3.14 (1H, dd,  $J = 14.9, 3.9$ , H-8), 0.36 (3H, d,  $J = 7.0$ , H-13).

$^{13}\text{C}$  NMR (125 MHz,  $\text{CDCl}_3$ ,  $\delta/\text{ppm}$ ): 170.6 (C-10), 169.5 (C-13), 137.8 (C-7a), 129.2 (C-3a), 125.8 (C-2), 122.5 (C-5), 120.1 (C-4), 120.0 (C-6), 112.1 (C-7), 109.3 (C-3), 57.5 (C-9), 51.7 (C-12), 30.8 (C-8), 20.0 (C-15).

LR-ESI-MS:  $m/z$  258.1 [M + H]<sup>+</sup>.

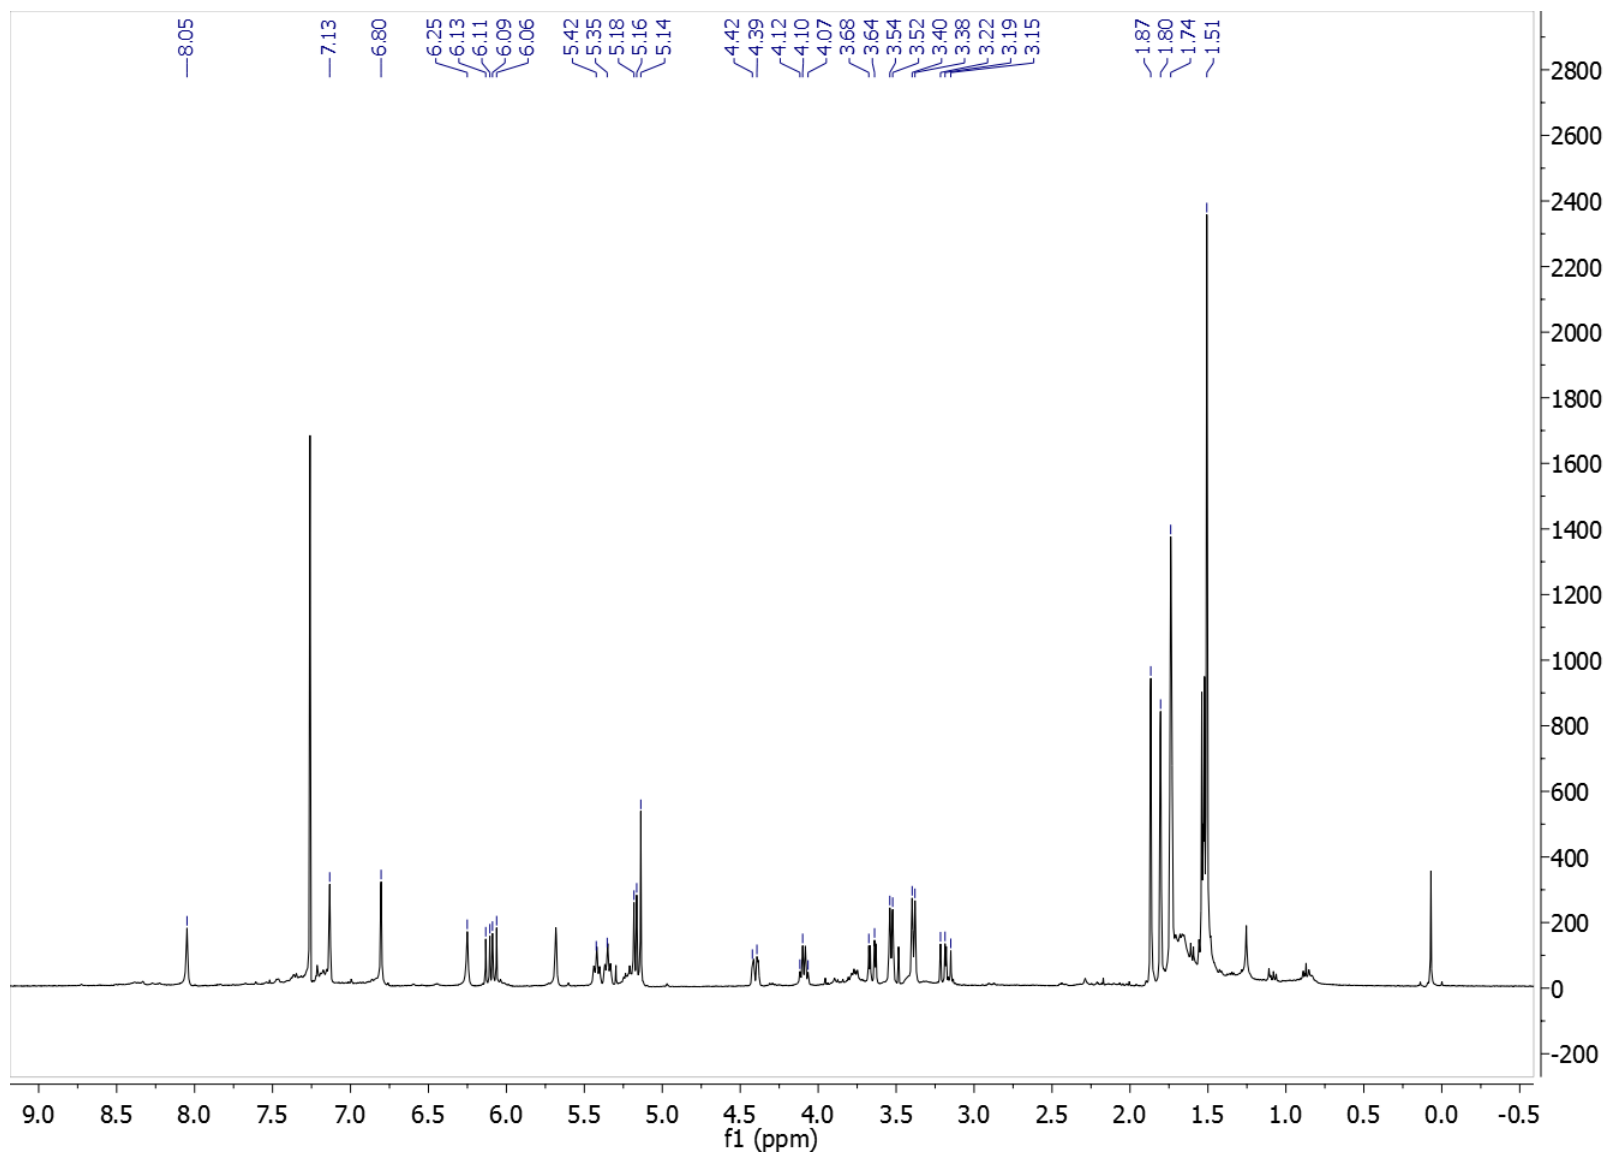

Figure S1. <sup>1</sup>H NMR spectrum of echinulin (1) in CDCl<sub>3</sub> at 500 MHz.

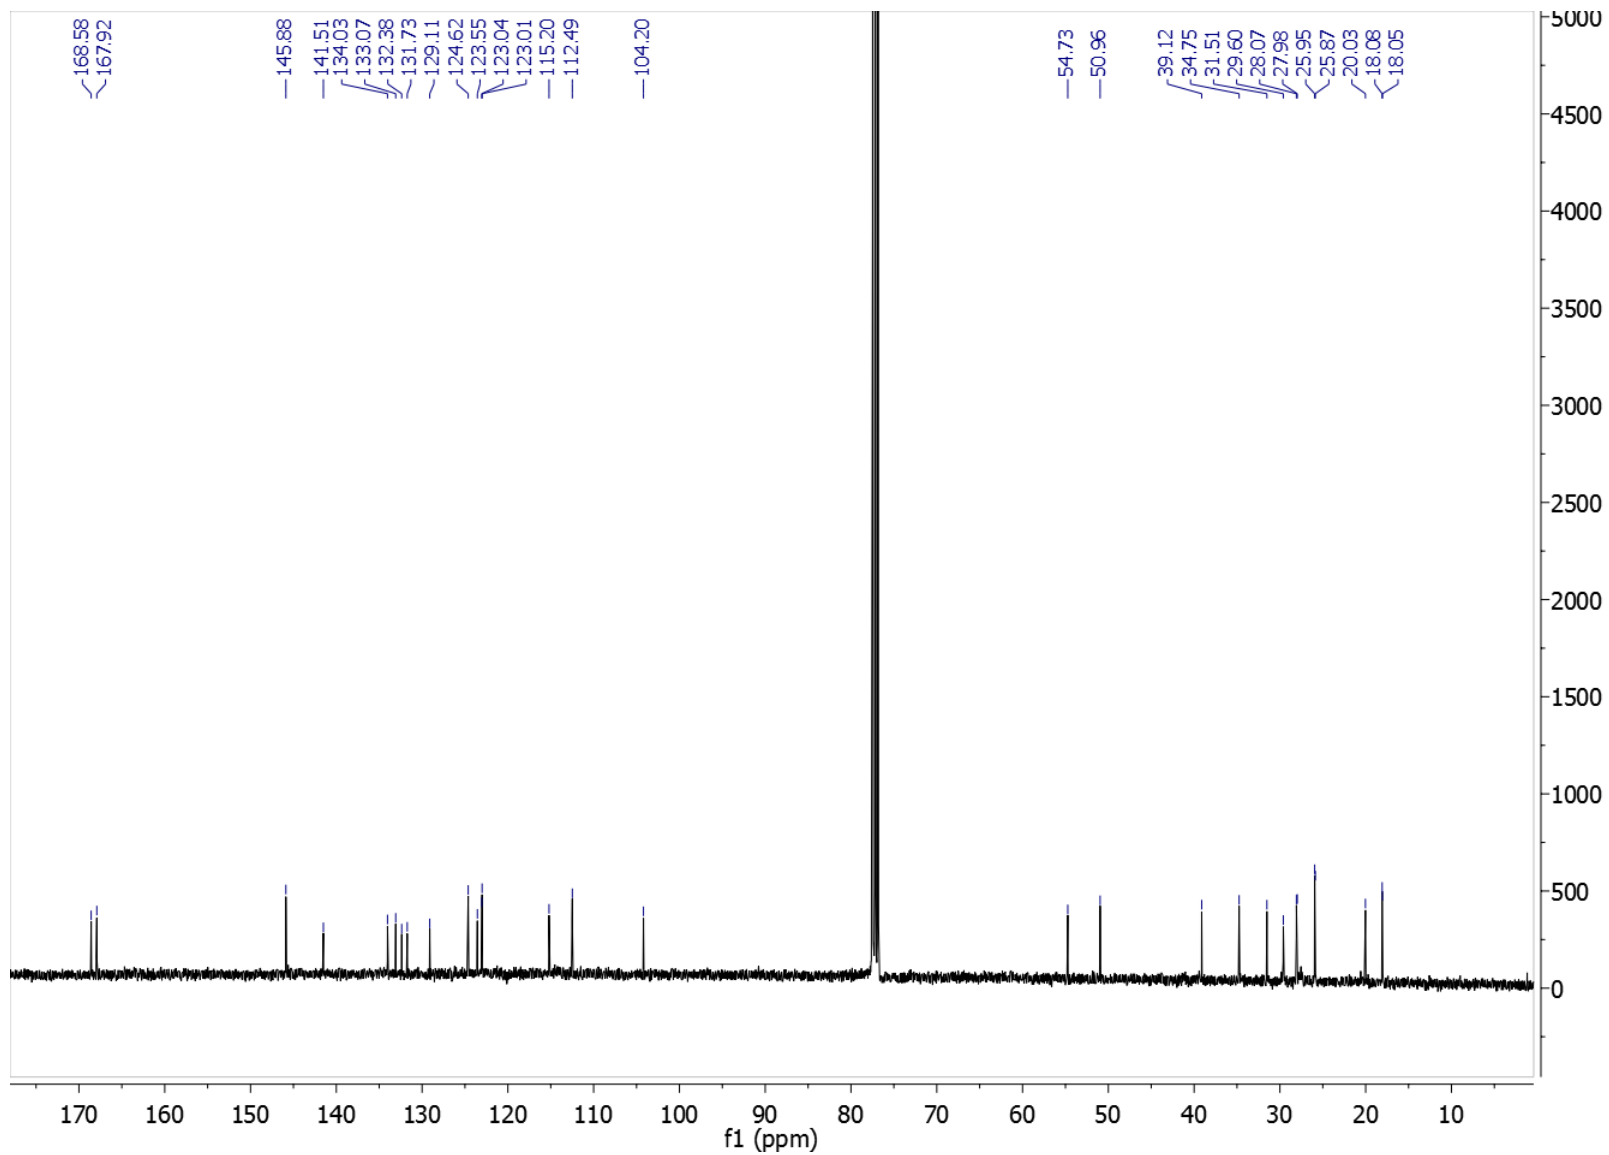

Figure S2.  $^{13}\text{C}$  NMR spectrum of echinulin (1) in  $\text{CDCl}_3$  at 125 MHz.



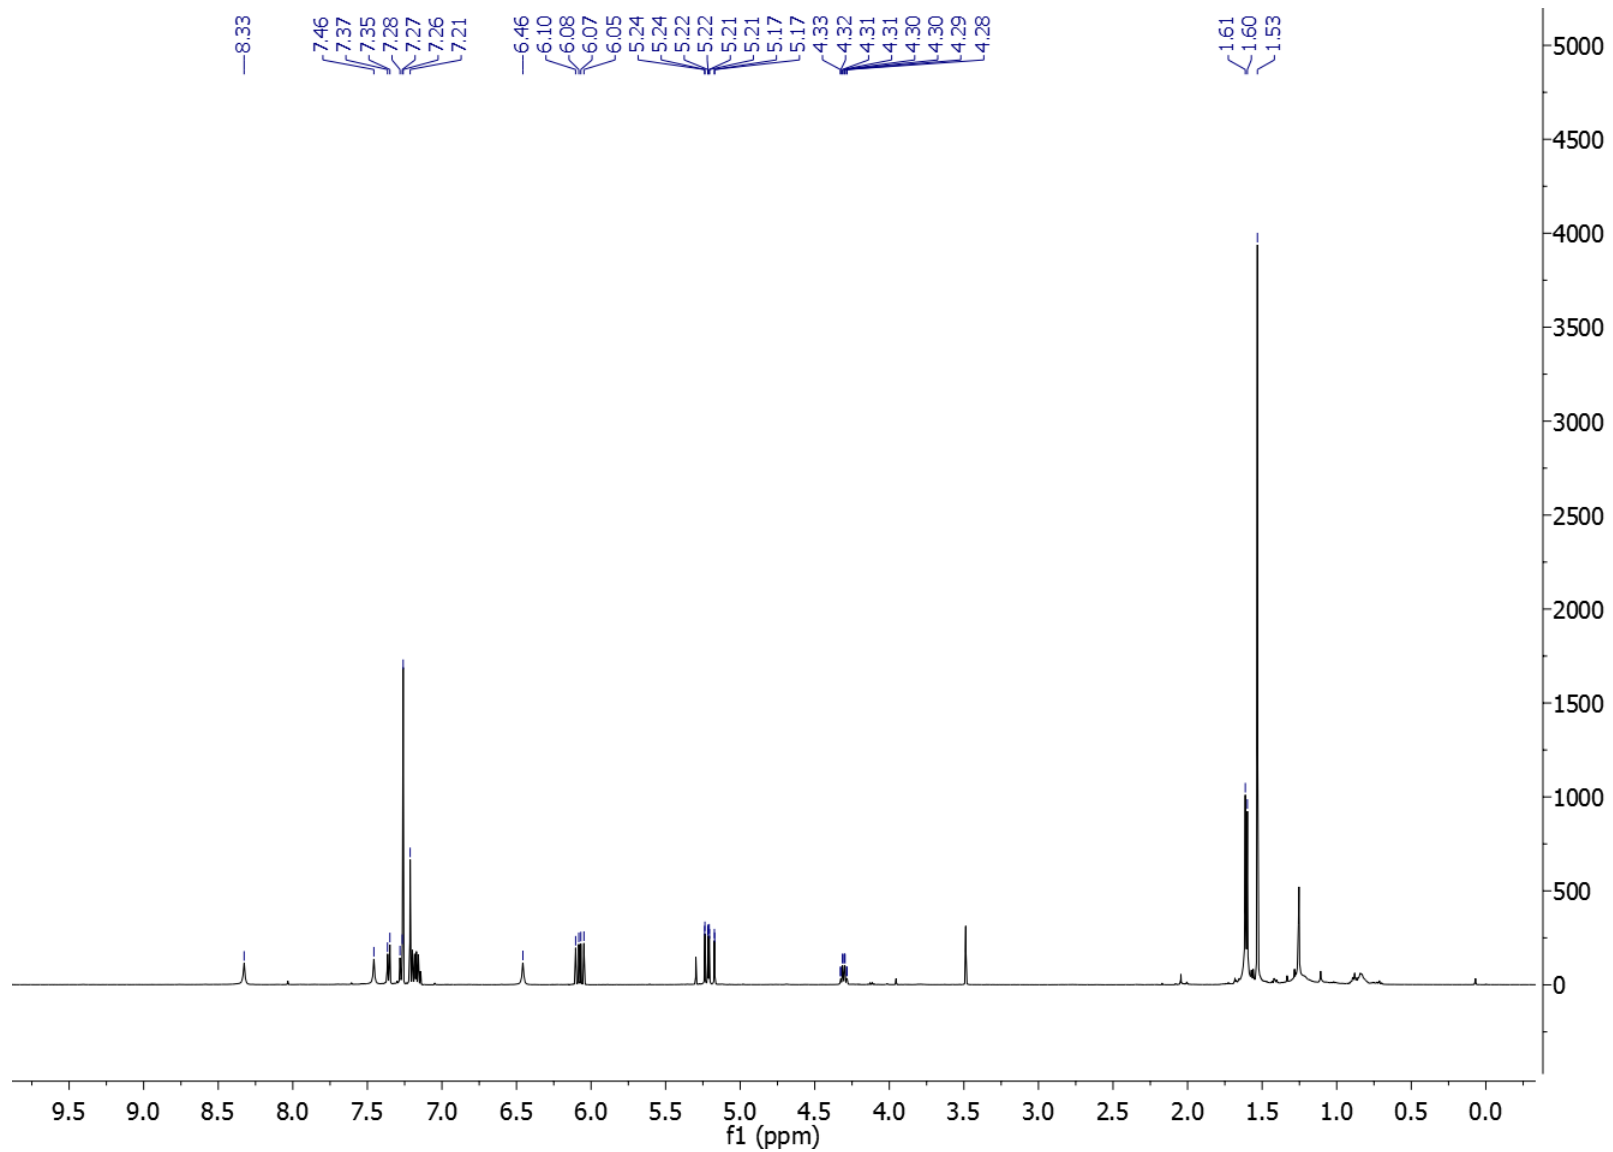

Figure S3.  $^1\text{H}$  NMR spectrum of neoechinulin A (2) in  $\text{CDCl}_3$  at 500 MHz.

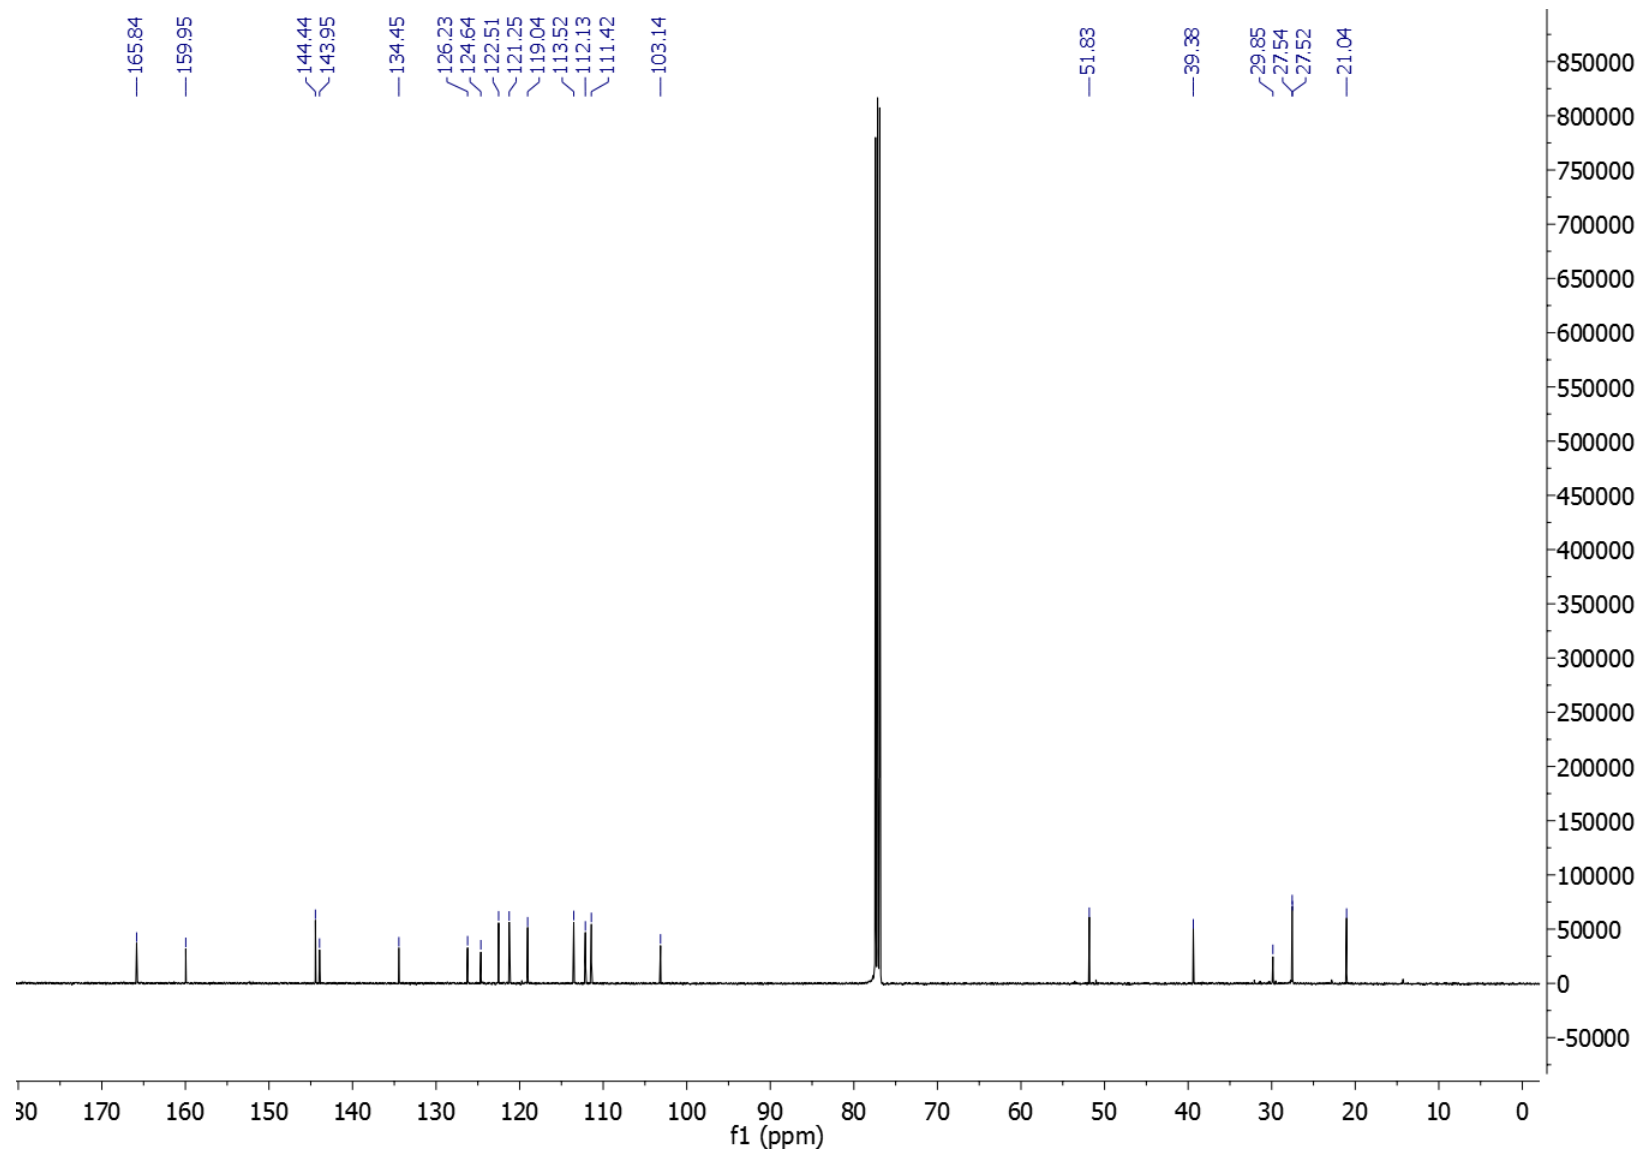

Figure S4.  $^{13}\text{C}$  NMR spectrum of neoechinulin A (2) in  $\text{CDCl}_3$  at 125 MHz.

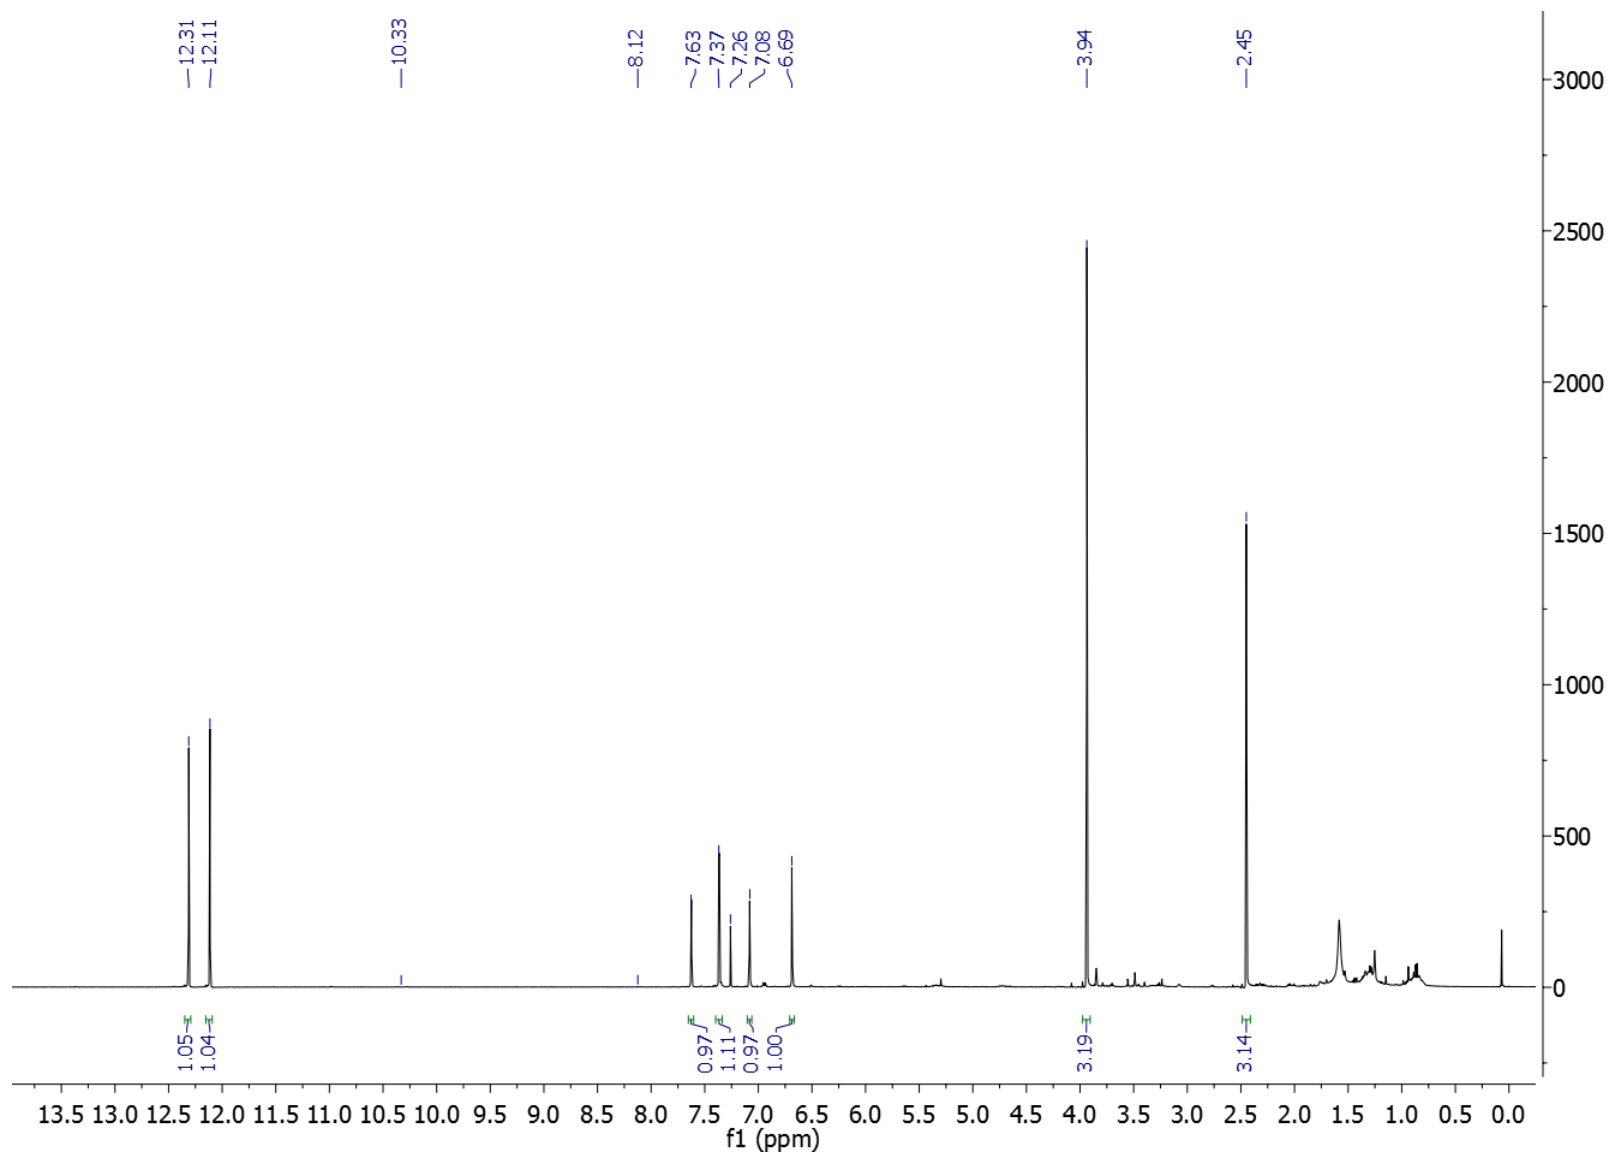

Figure S5.  $^1\text{H}$  NMR spectrum of physcion (3) in  $\text{CDCl}_3$  at 500 MHz.

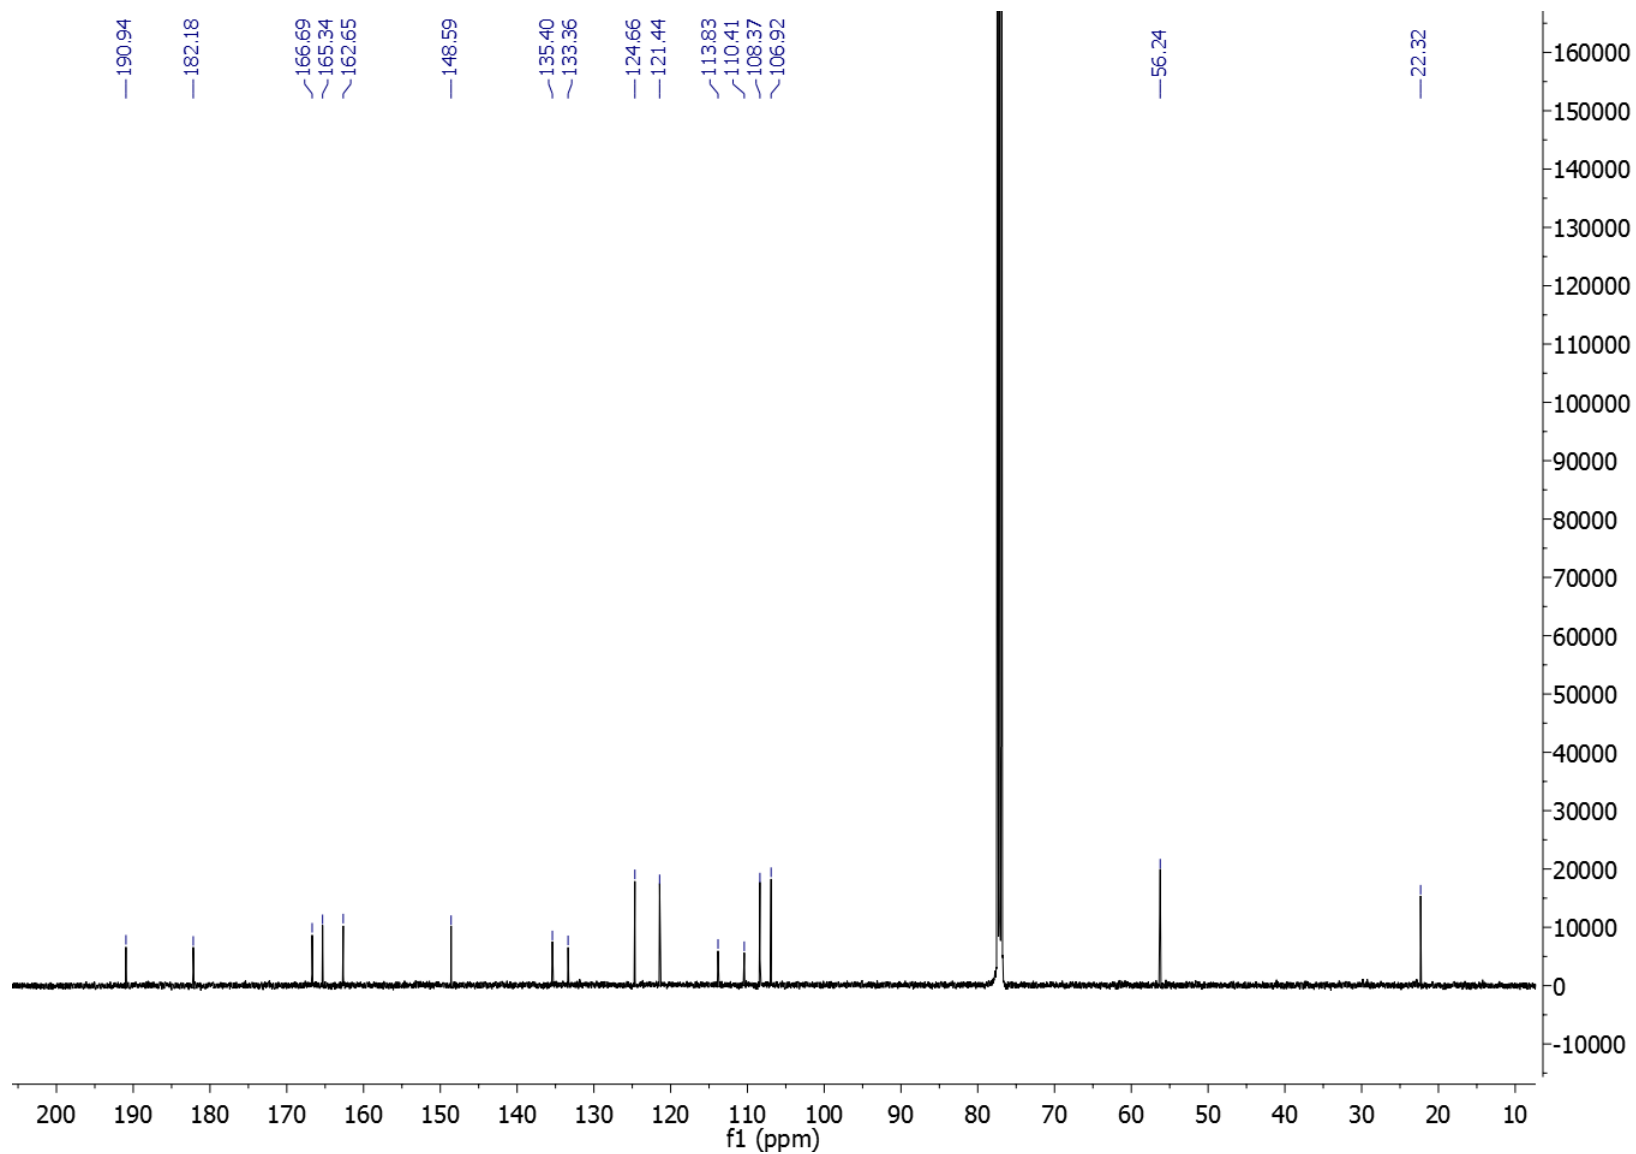

Figure S6.  $^{13}\text{C}$  NMR spectrum of physcion (3) in  $\text{CDCl}_3$  at 125 MHz.

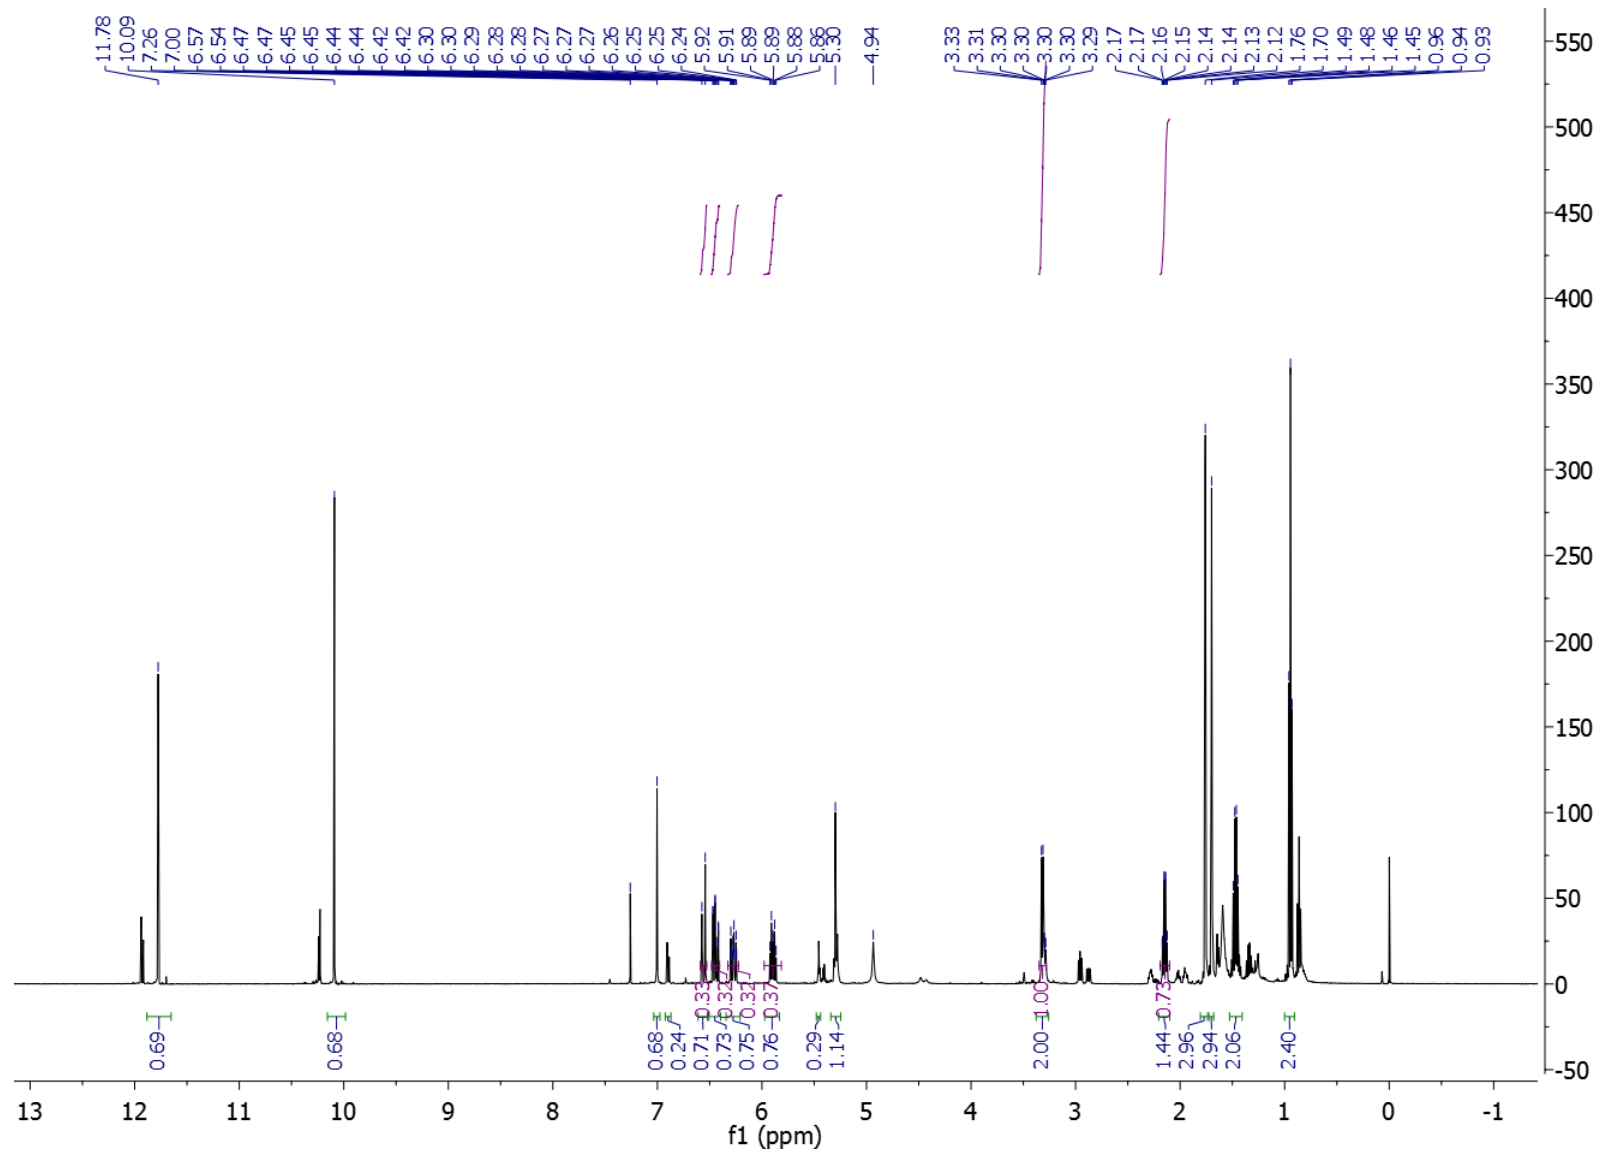

Figure S7.  $^1\text{H}$  NMR spectrum of dihydroauroglucin (**4**) in  $\text{CDCl}_3$  at 500 MHz.

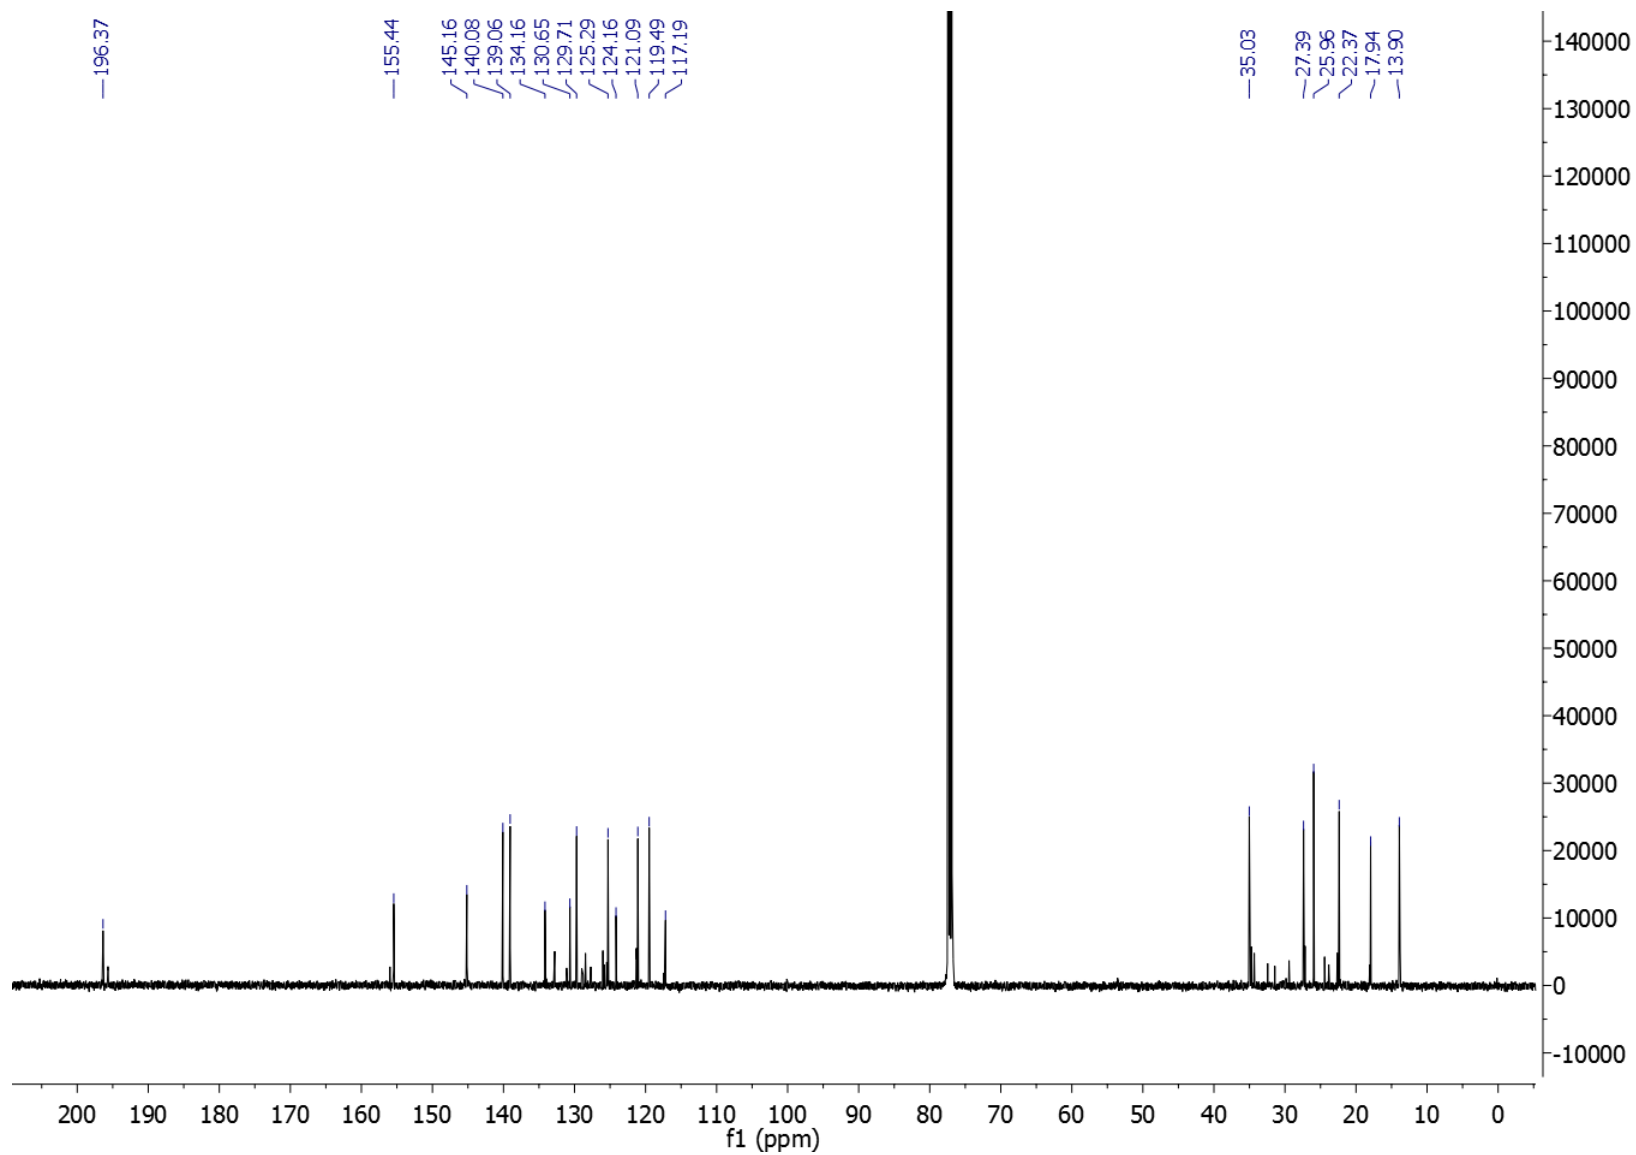

Figure S8.  $^{13}\text{C}$  NMR spectrum of dihydroauroglucin (4) in  $\text{CDCl}_3$  at 125 MHz.

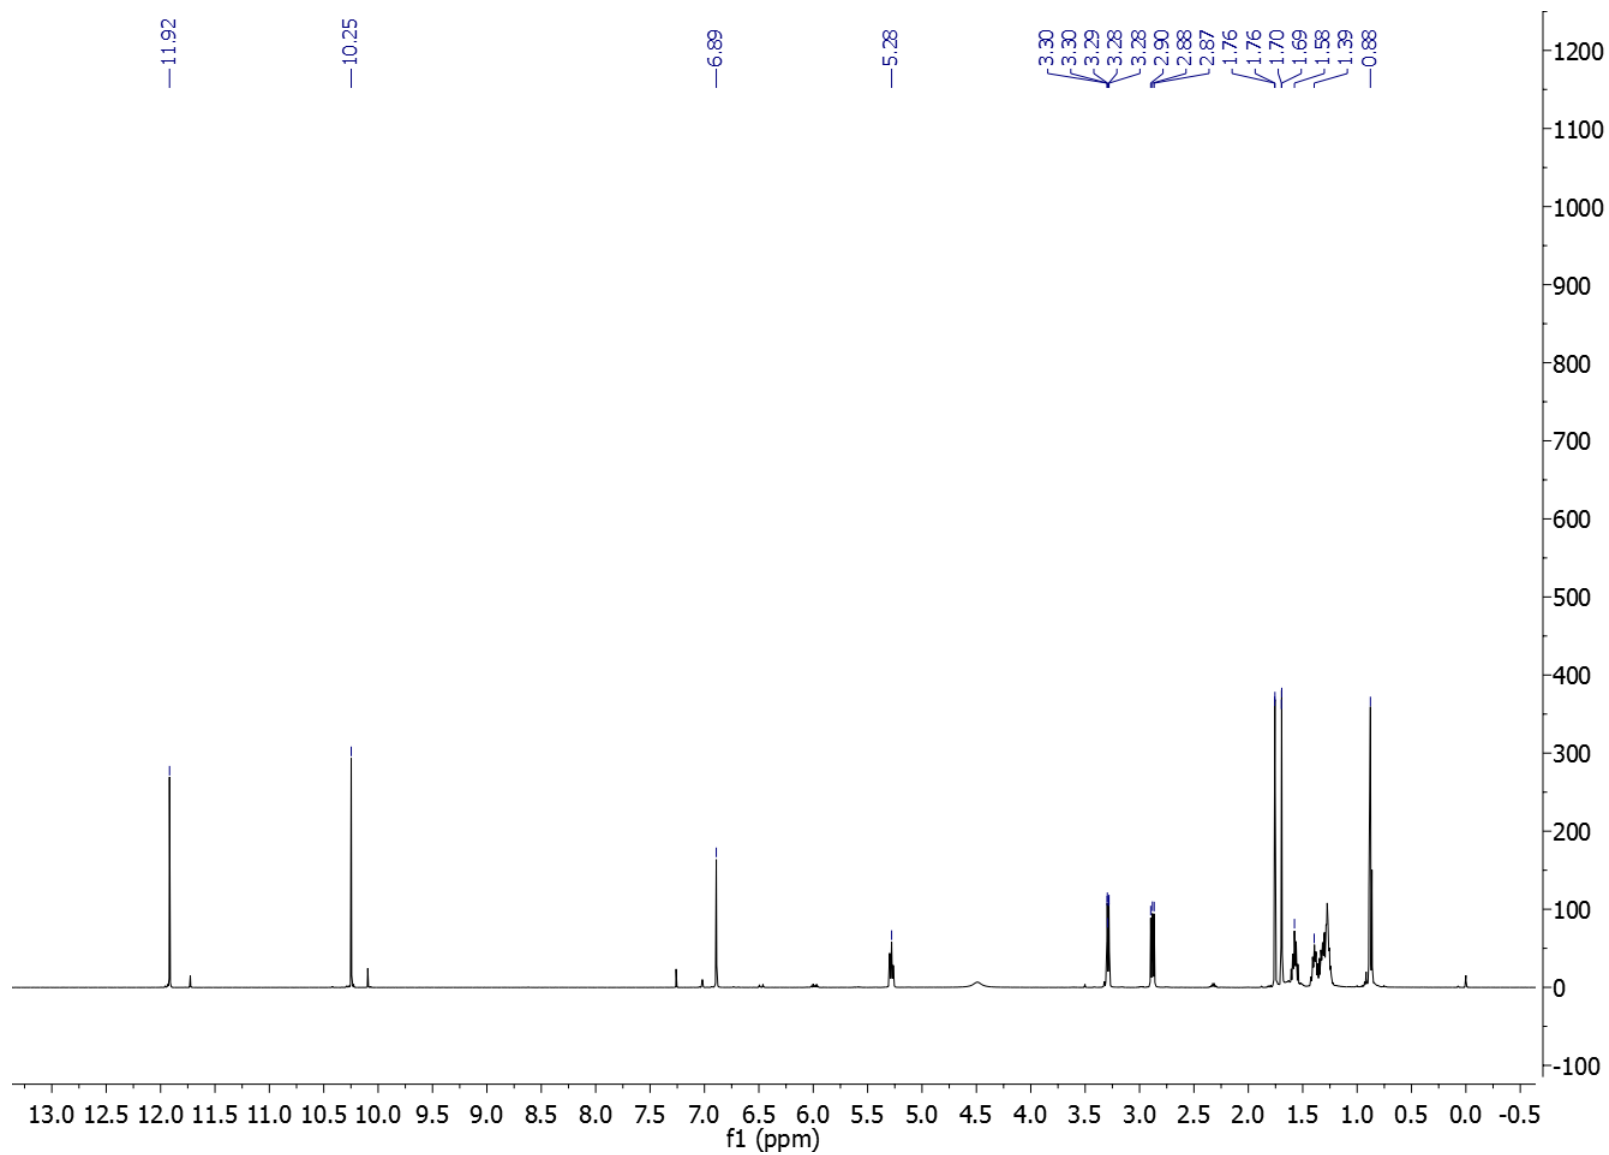

Figure S9.  $^1\text{H}$  NMR spectrum of flavoglaucin (5) in  $\text{CDCl}_3$  at 500 MHz.

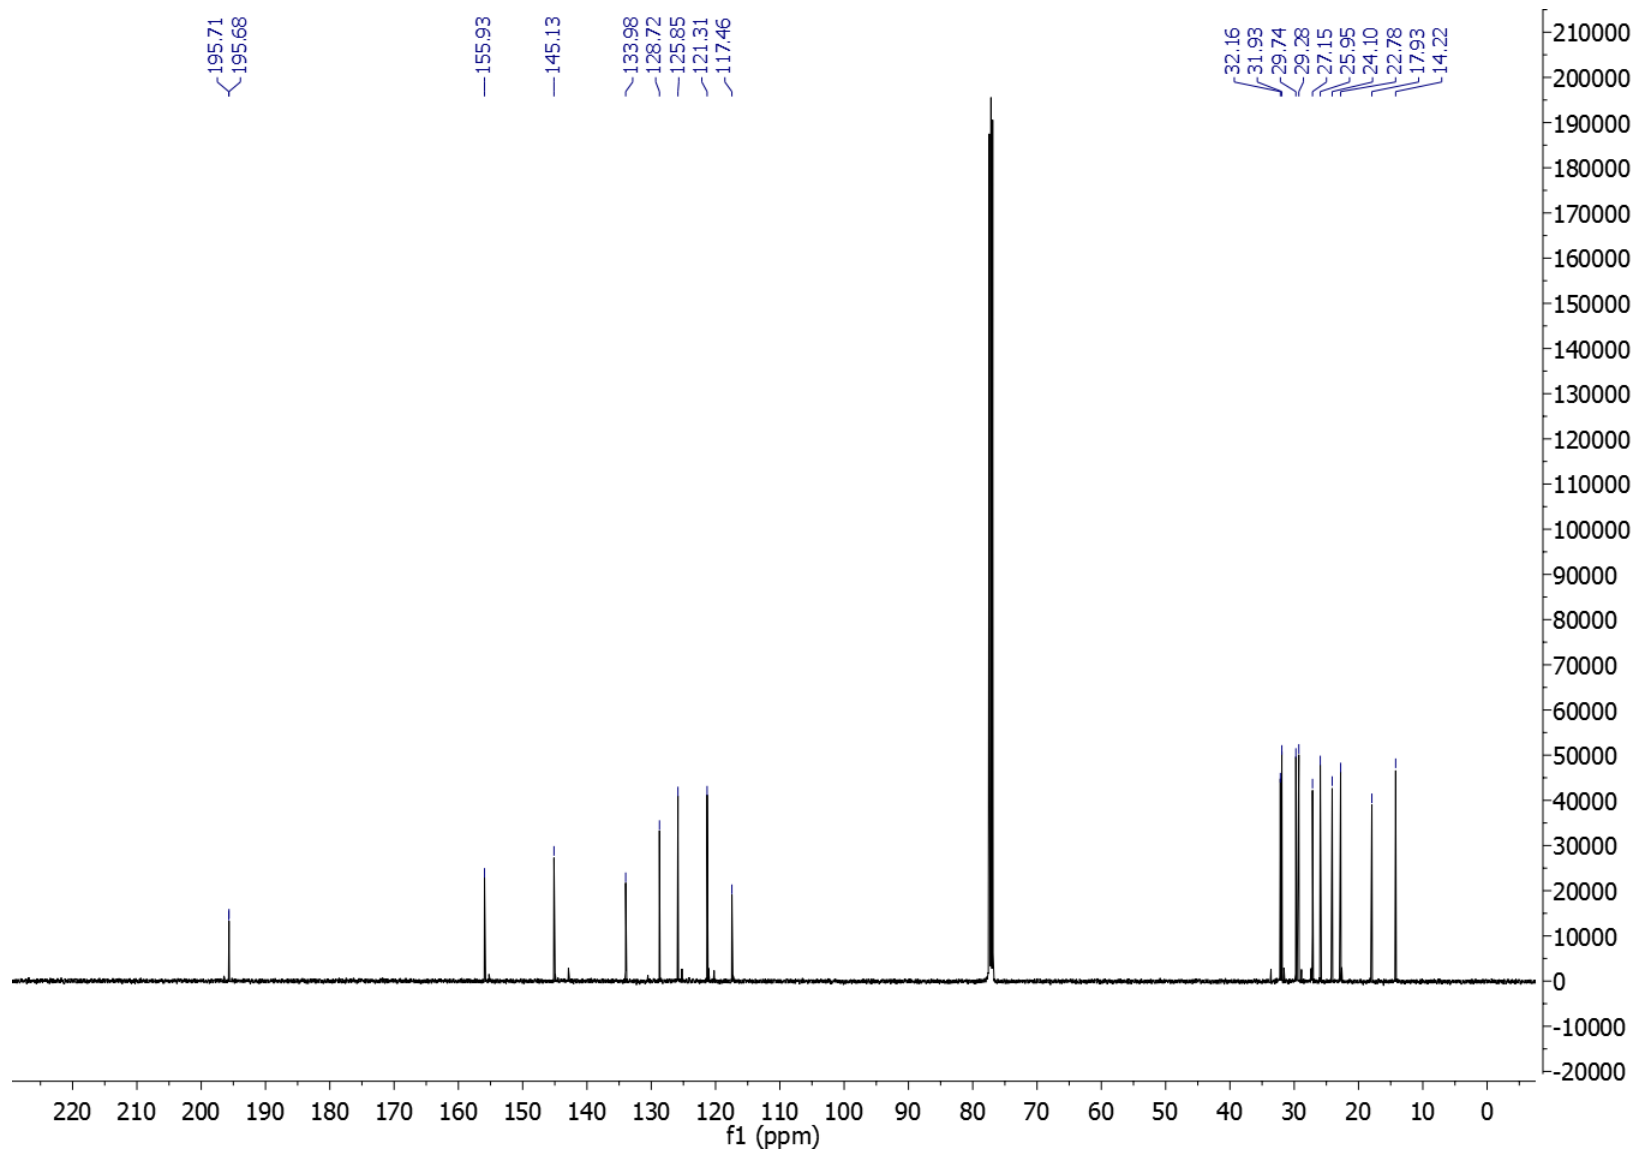

Figure S10.  $^{13}\text{C}$  NMR spectrum of flavoglauцин (5) in  $\text{CDCl}_3$  at 125 MHz.



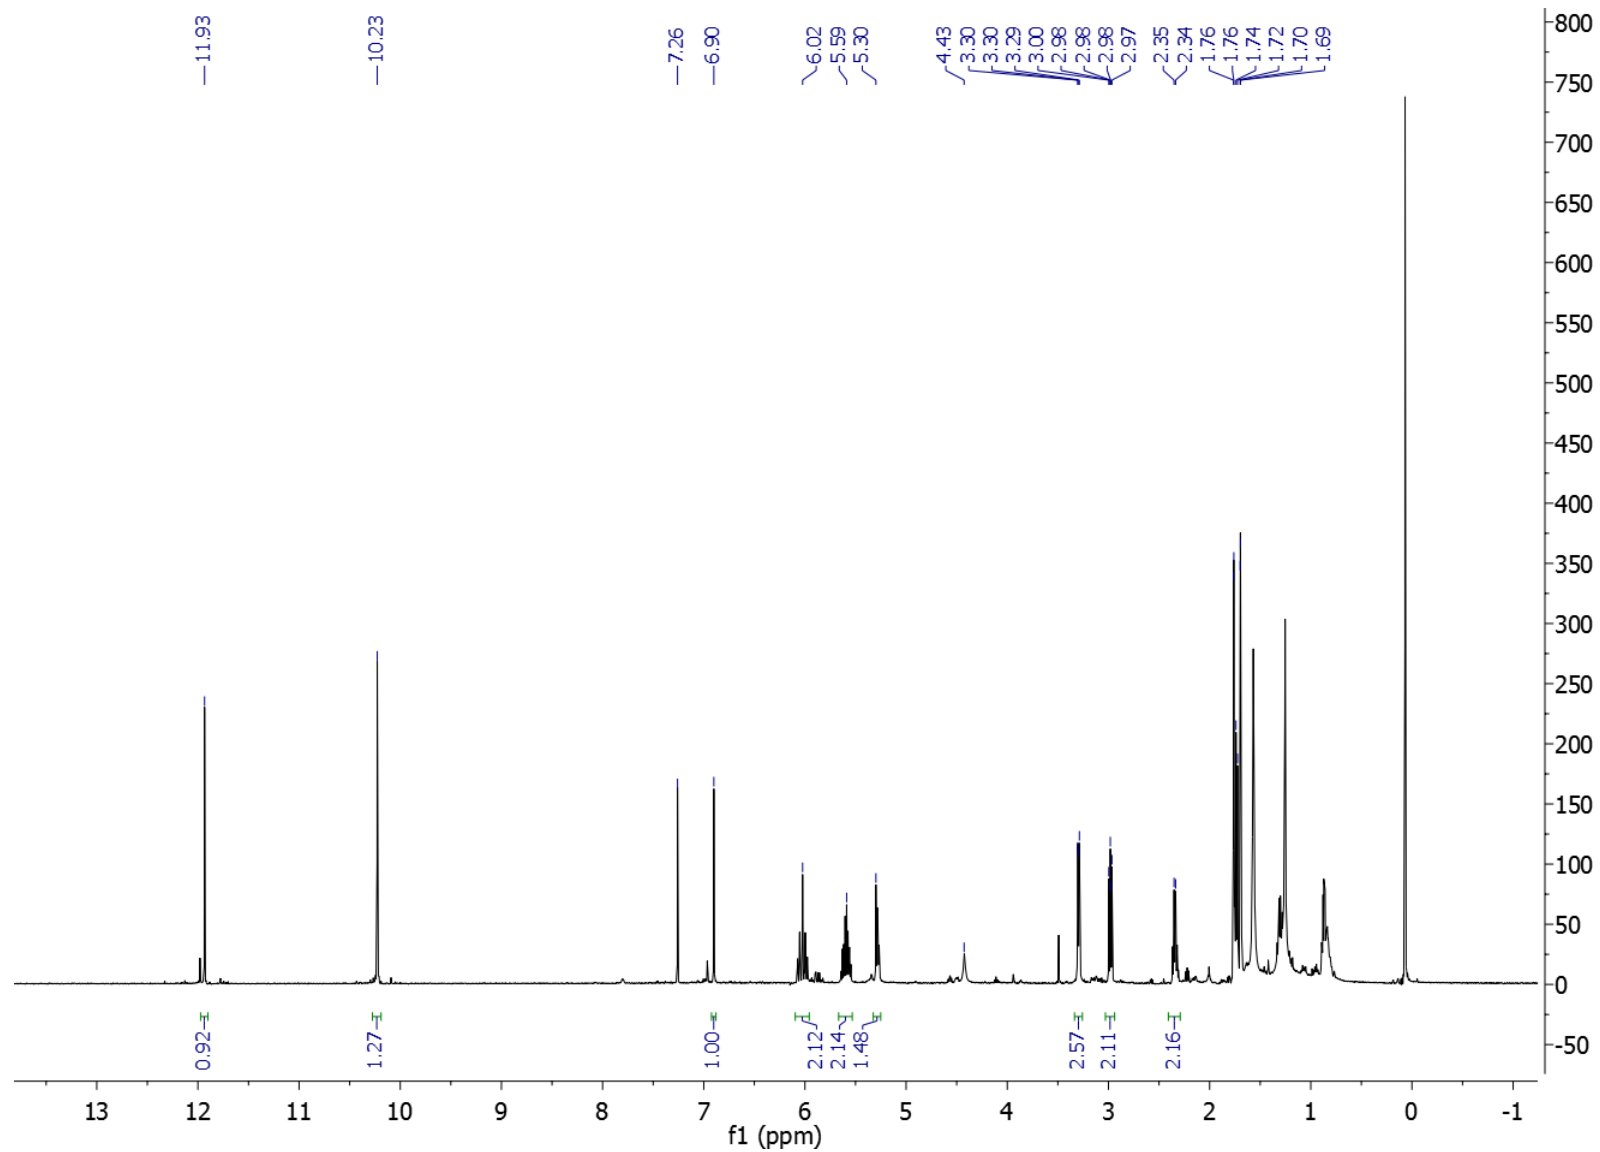

Figure S11.  $^1\text{H}$  NMR spectrum of isodihydroauroglaucin (**6**) in  $\text{CDCl}_3$  at 500 MHz.

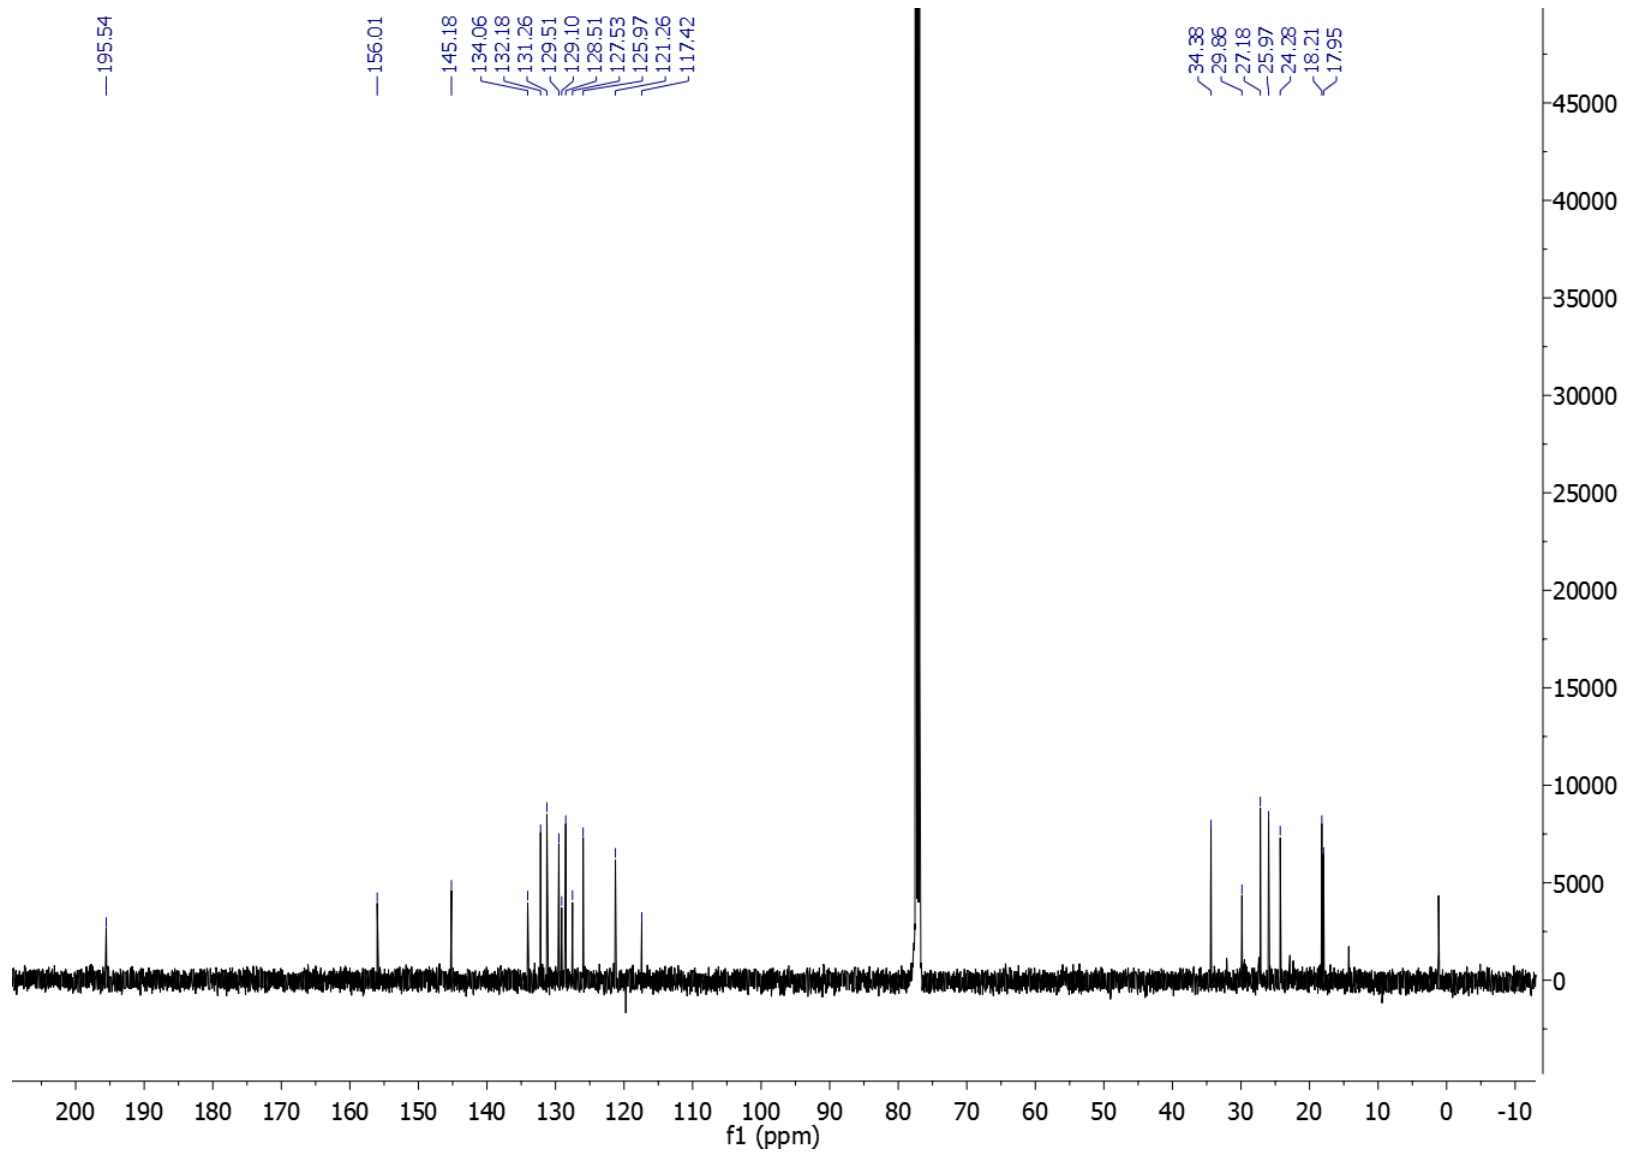

Figure S12.  $^{13}\text{C}$  NMR spectrum of isodihydroauroglaucin (**6**) in  $\text{CDCl}_3$  at 125 MHz.

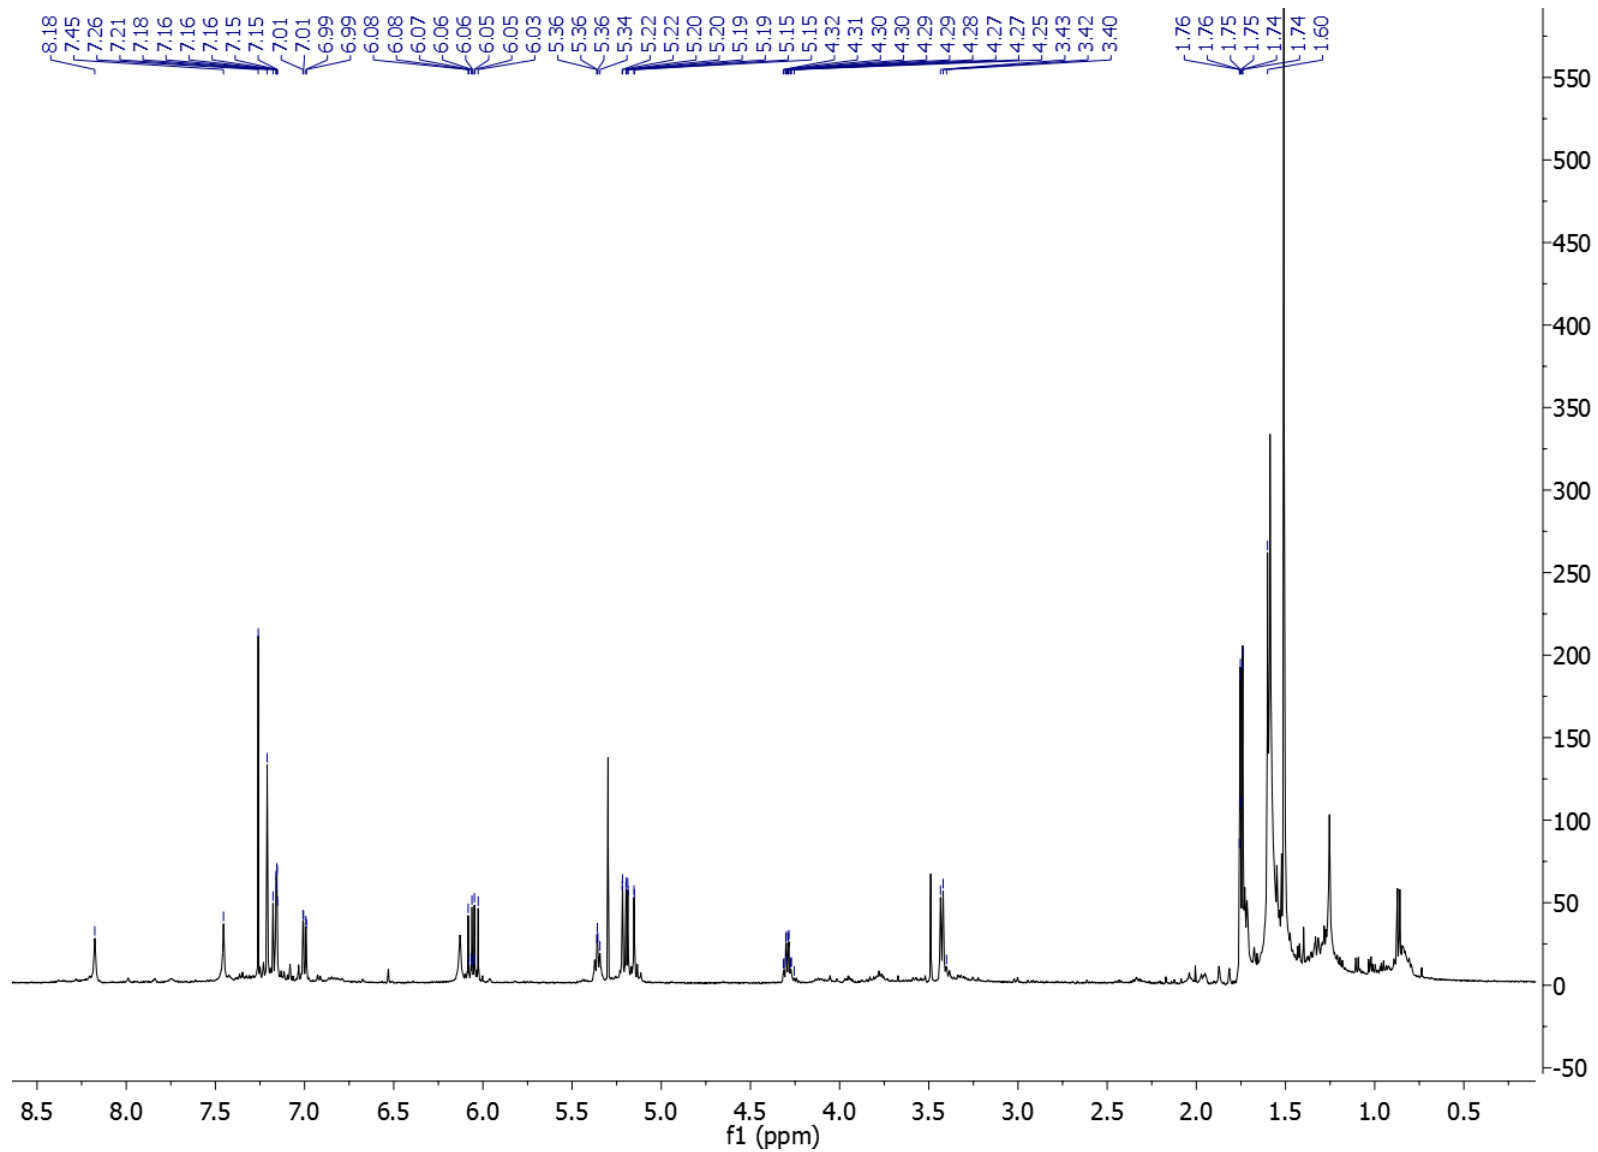

Figure S13. <sup>1</sup>H NMR spectrum of neochininul D (7) in CDCl<sub>3</sub> at 500 MHz.

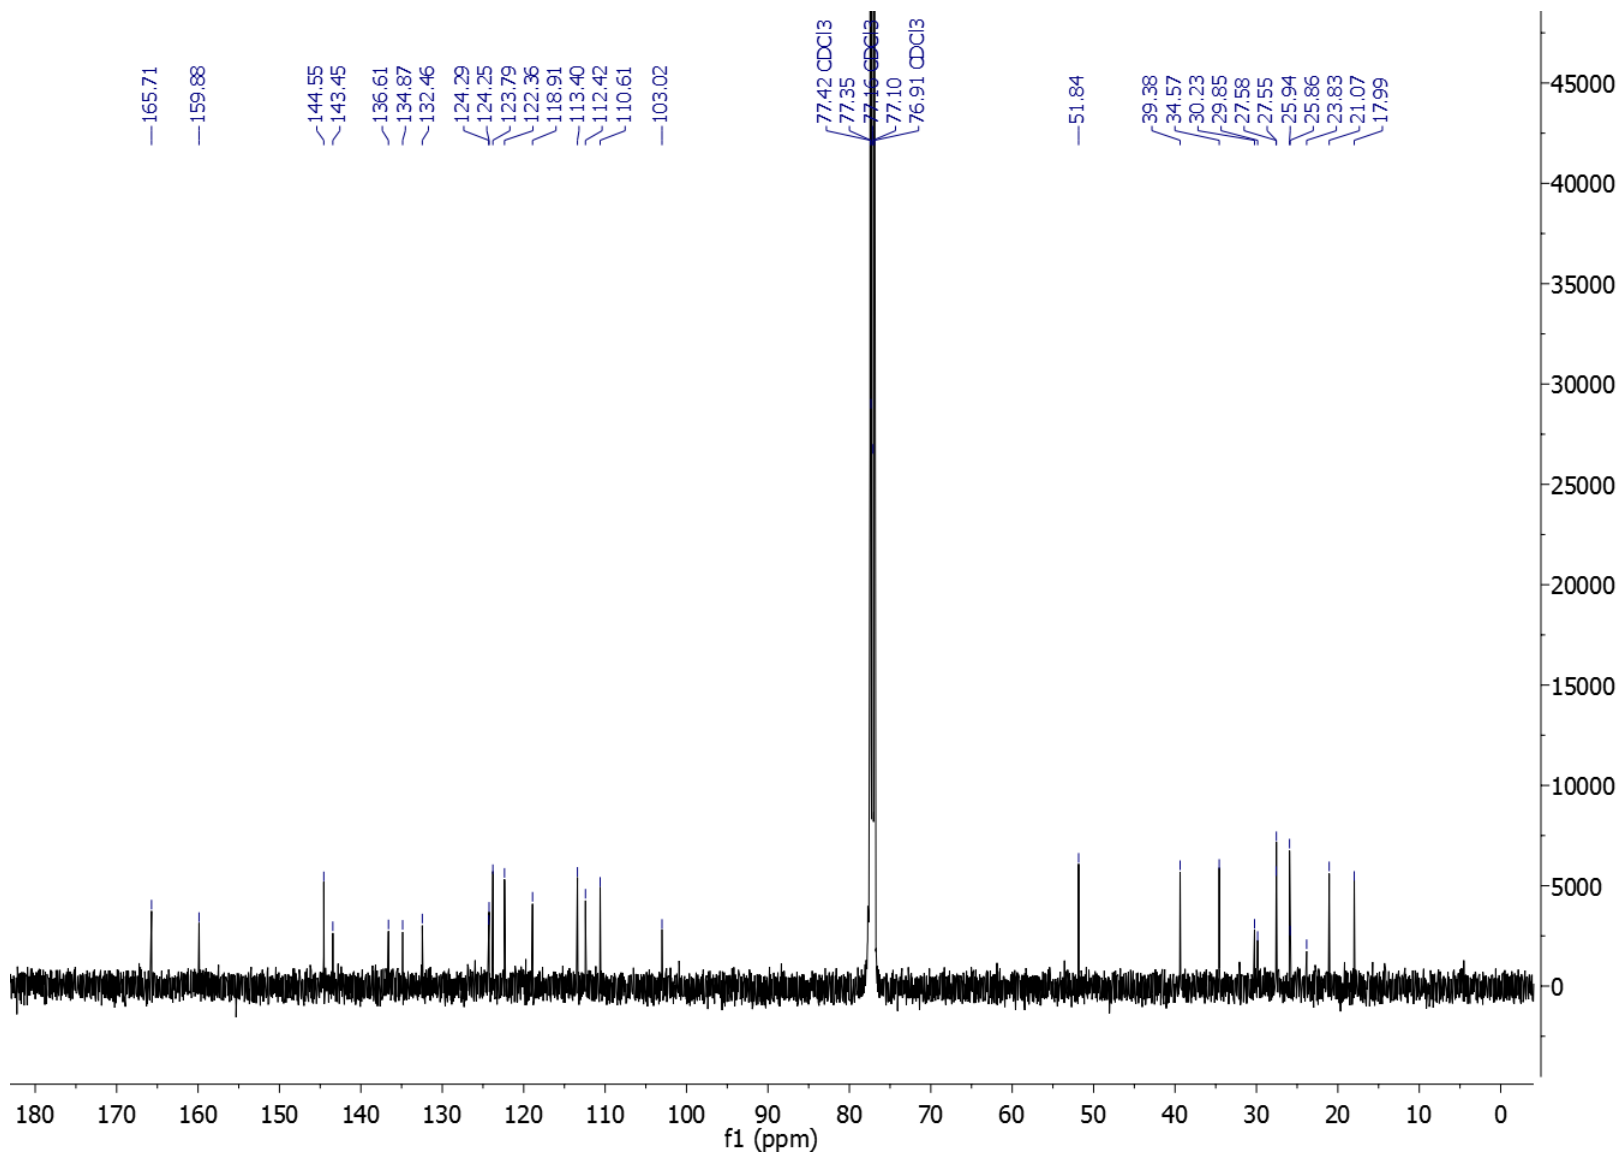

Figure S14.  $^{13}\text{C}$  NMR spectrum of neoechinulin D (7) in  $\text{CDCl}_3$  at 125 MHz.

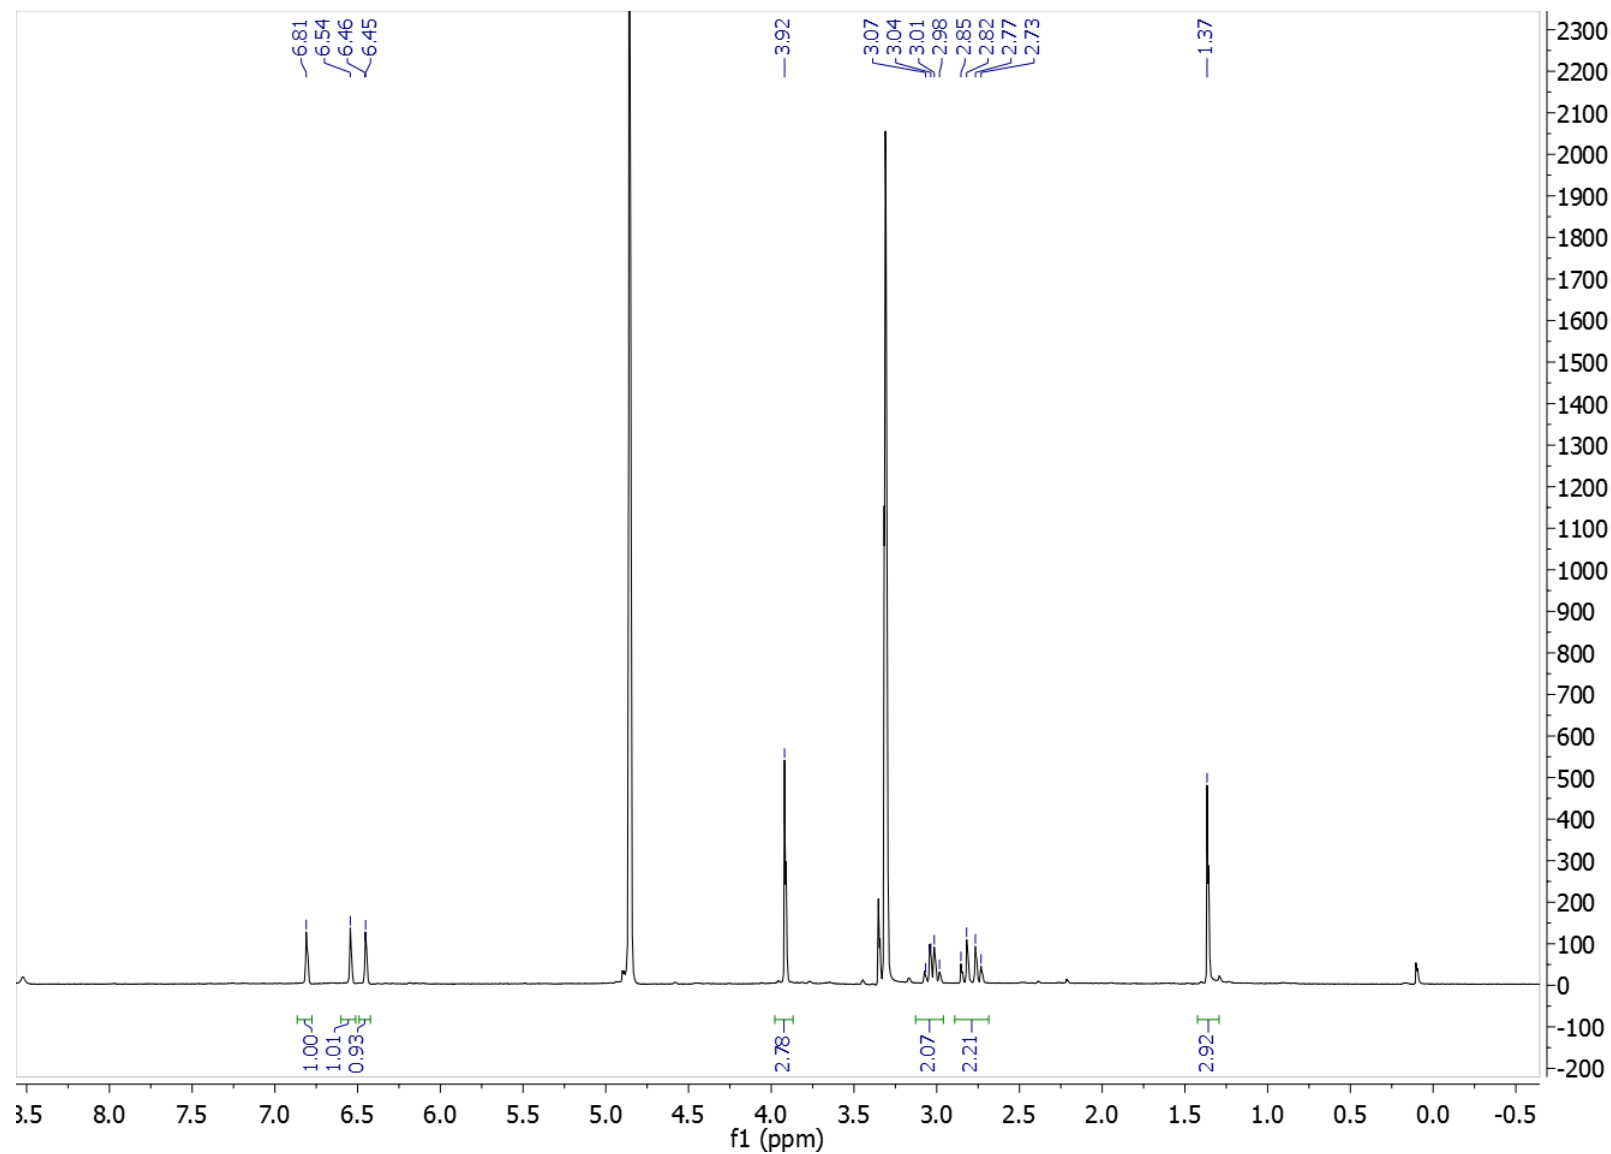

Figure S15.  $^1\text{H}$  NMR spectrum of asperflavin (8) in  $\text{CD}_3\text{OD}$  at 500 MHz.

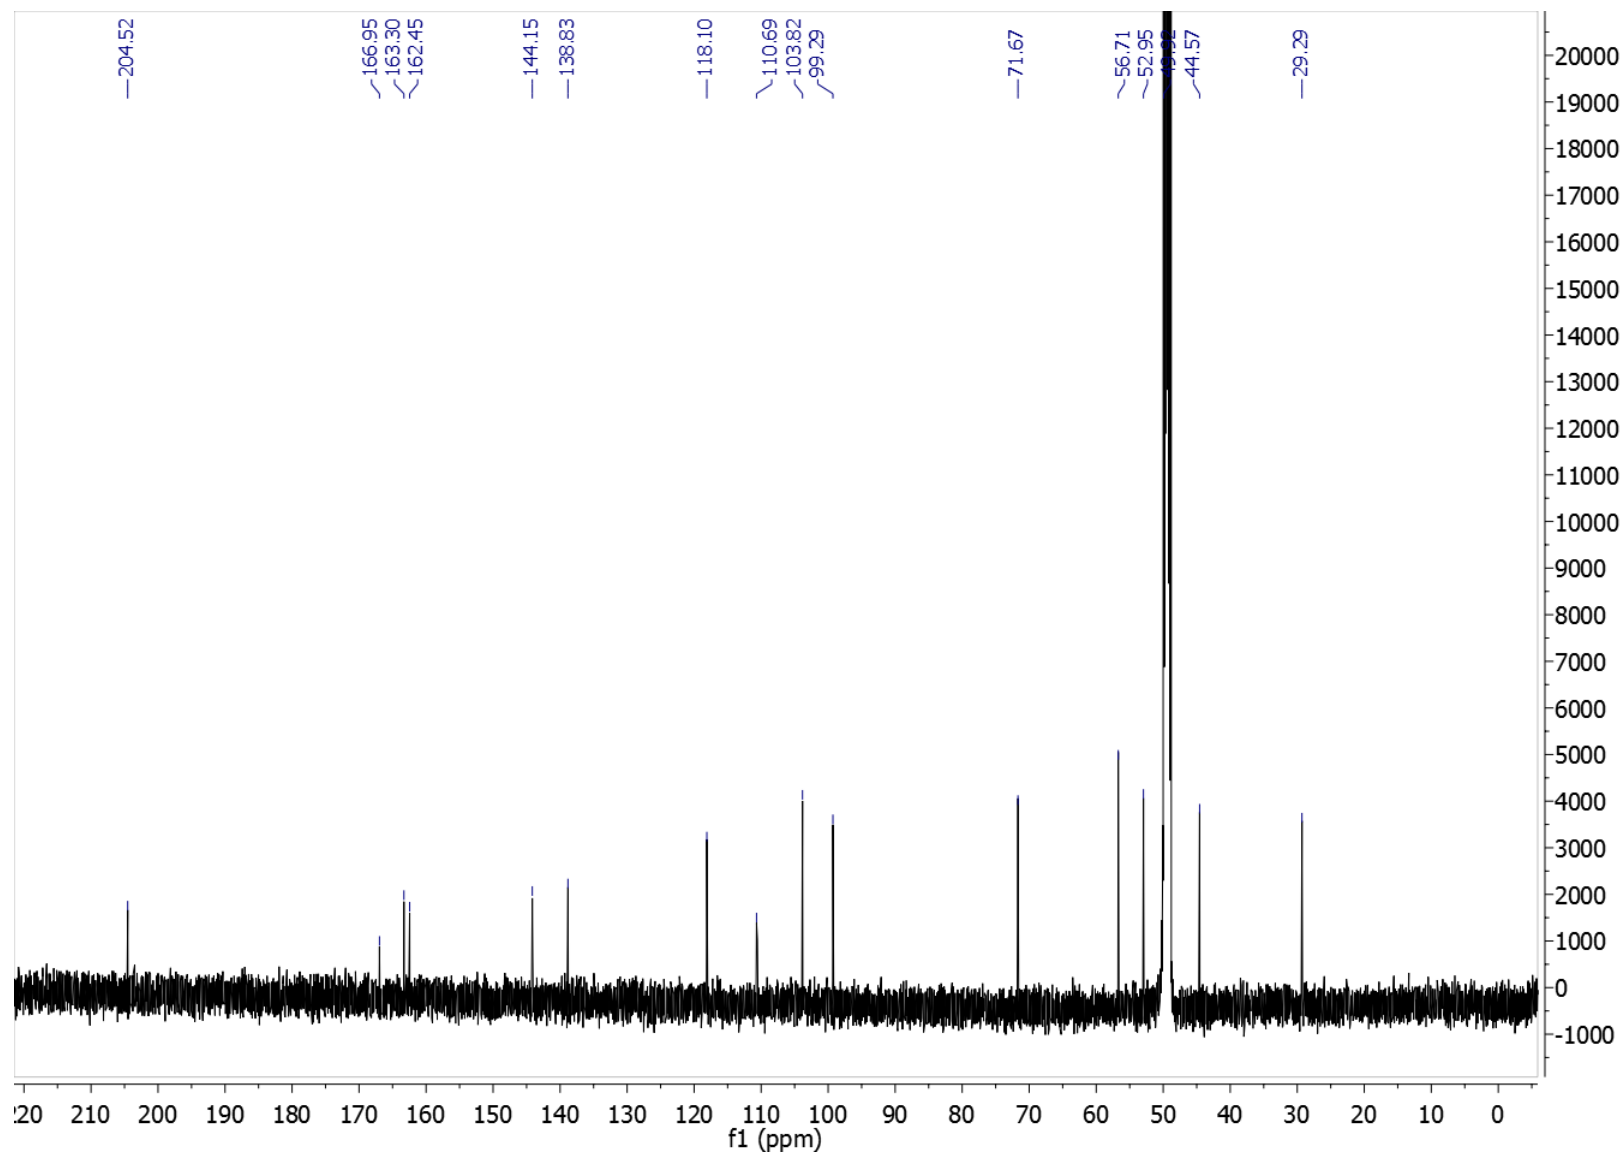

Figure S16.  $^{13}\text{C}$  NMR spectrum of asperflavin (8) in  $\text{CD}_3\text{OD}$  at 125 MHz.

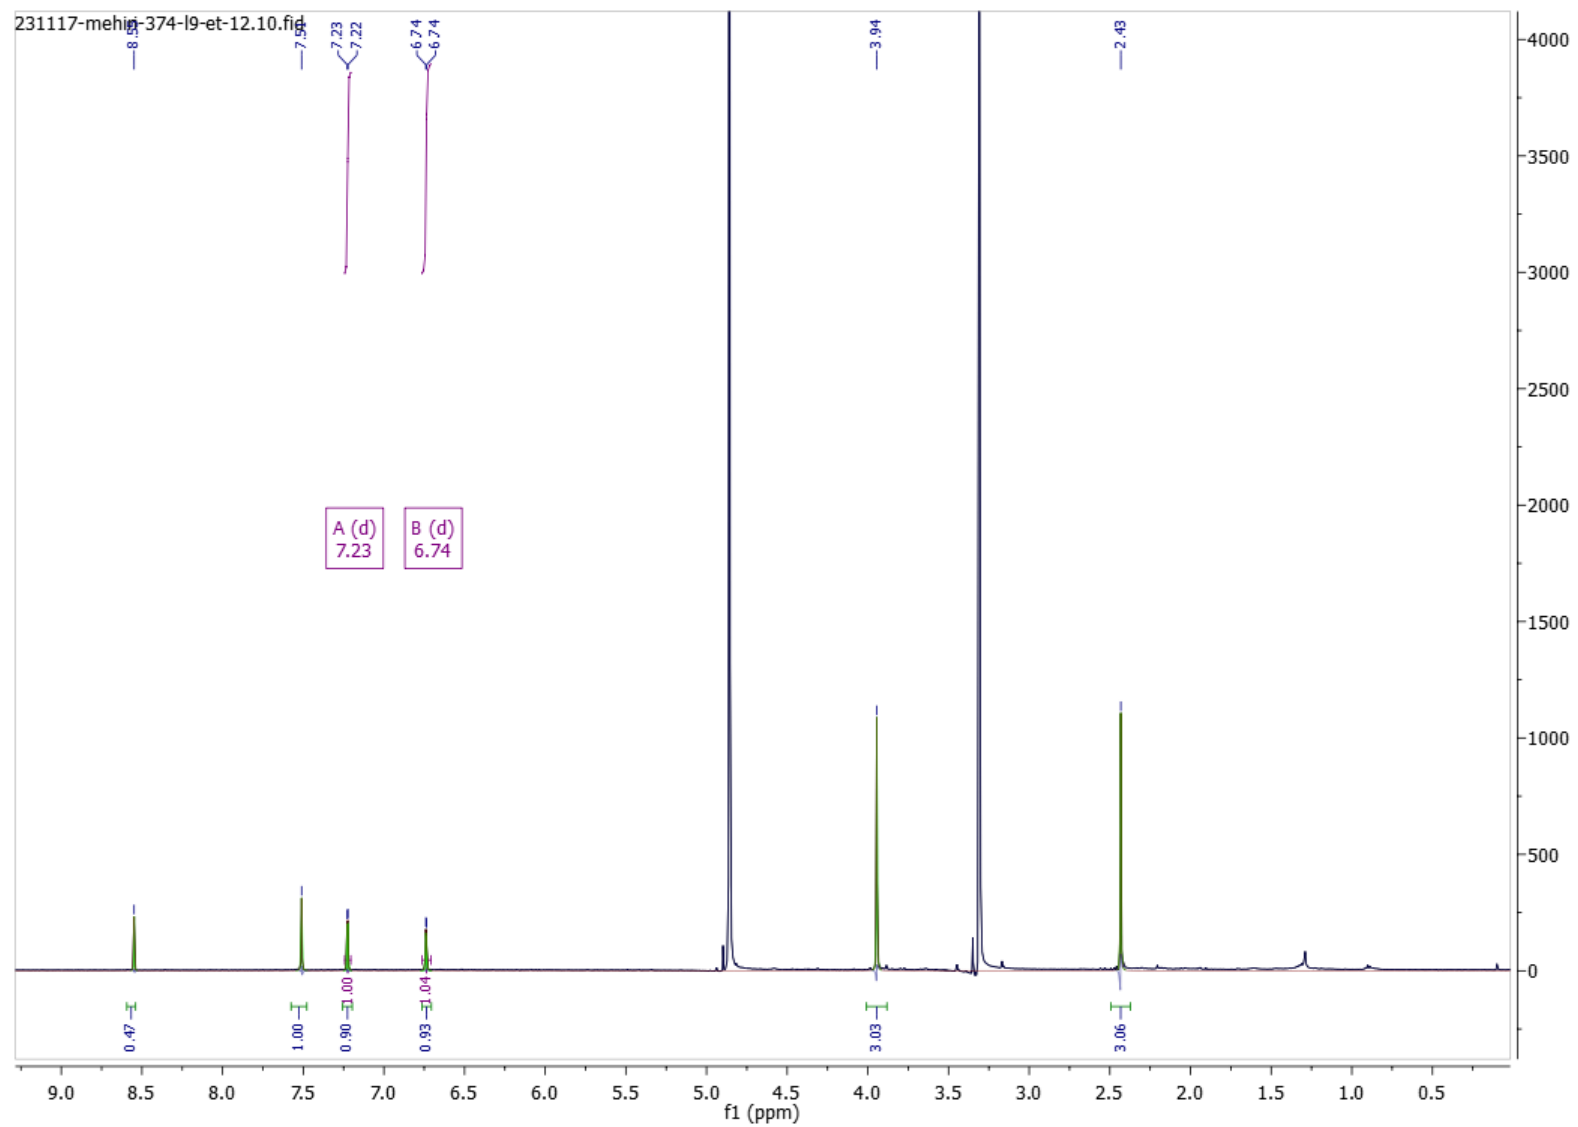

Figure S17.  $^1\text{H}$  NMR spectrum of cinnalutetin (**9**) in  $\text{CD}_3\text{OD}$  at 500 MHz.

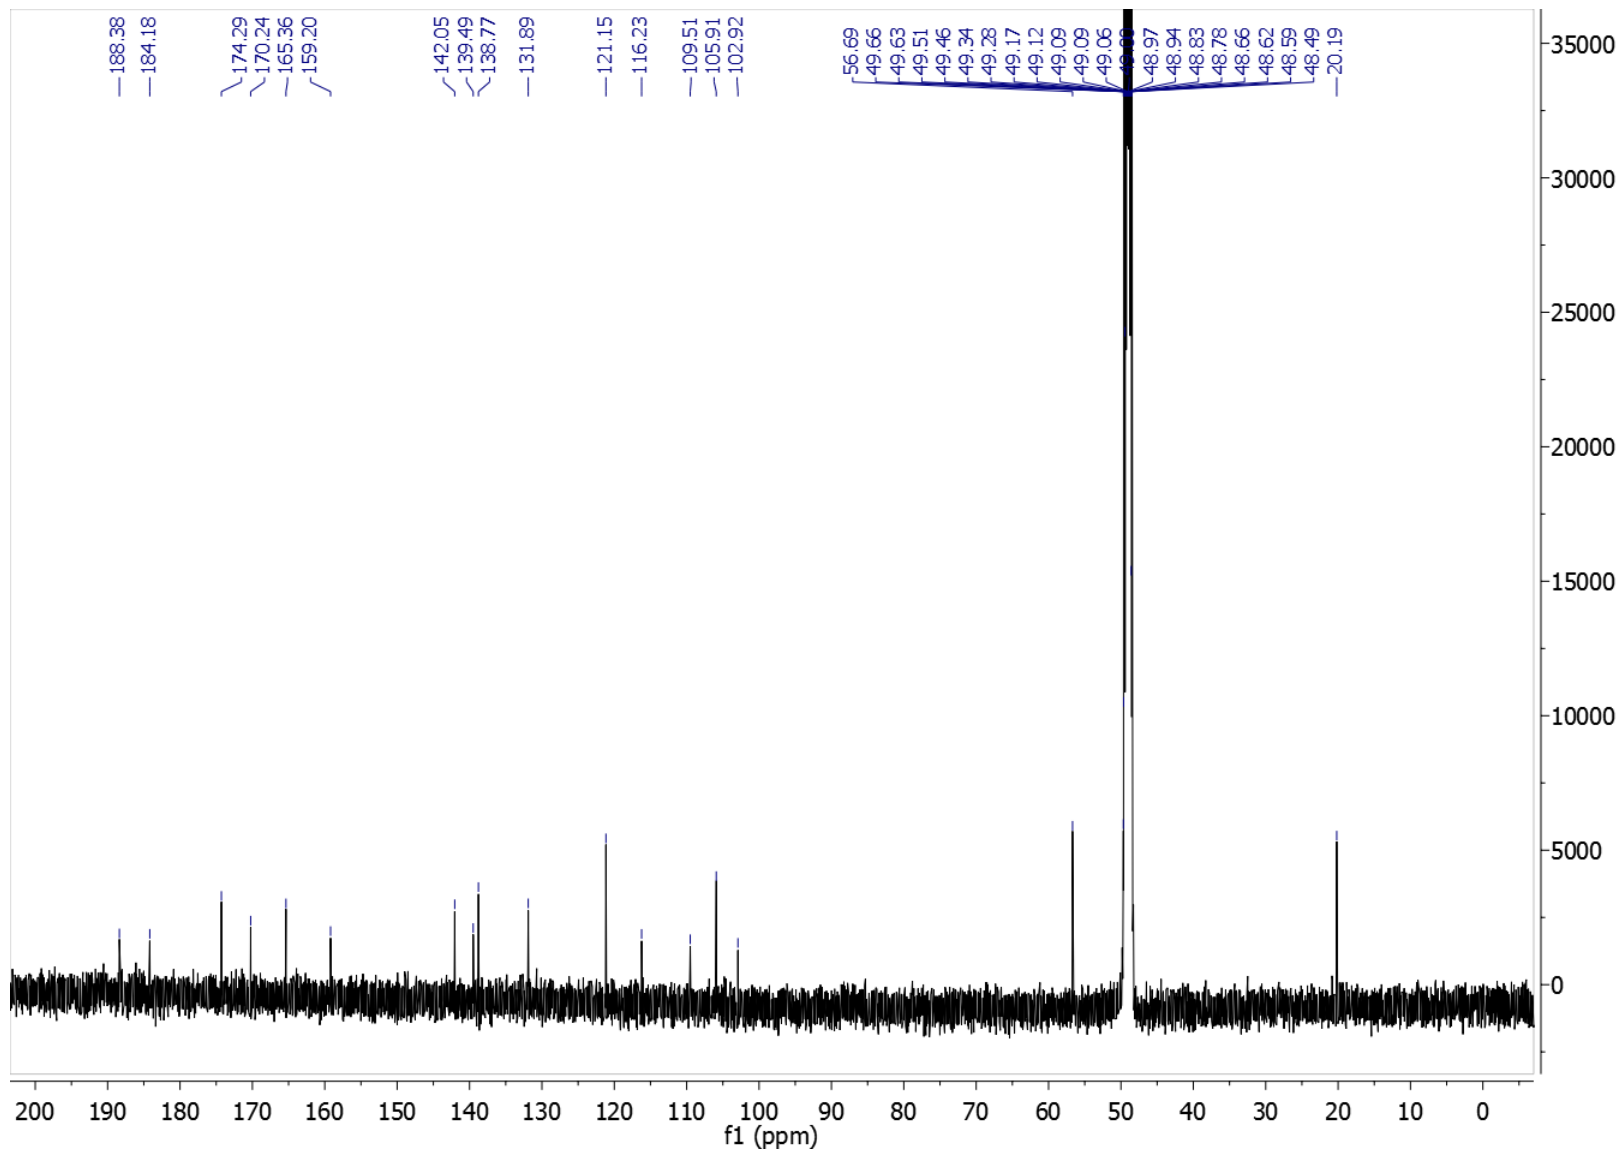

Figure S18.  $^{13}\text{C}$  NMR spectrum of cinnalutuin (9) in  $\text{CD}_3\text{OD}$  at 125 MHz.



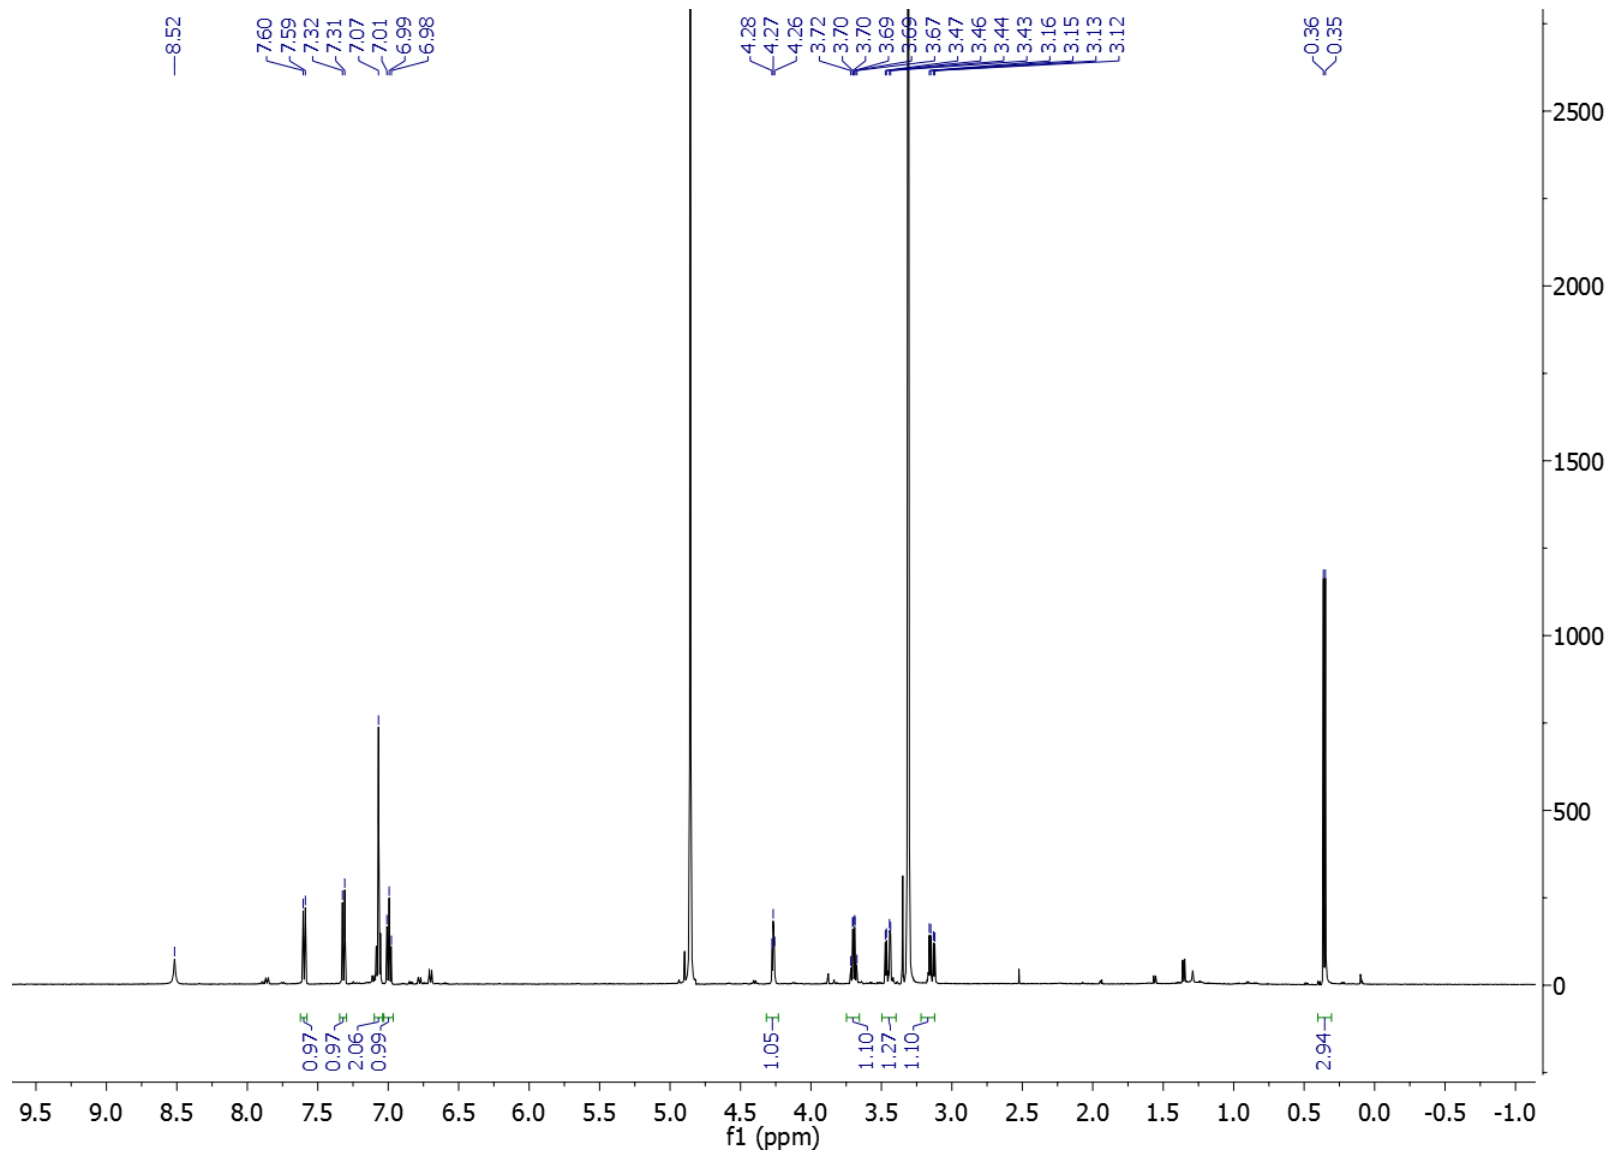

Figure S19.  $^1\text{H}$  NMR spectrum of cyclo-L-Trp- L-Ala (10) in  $\text{CD}_3\text{OD}$  at 500 MHz.

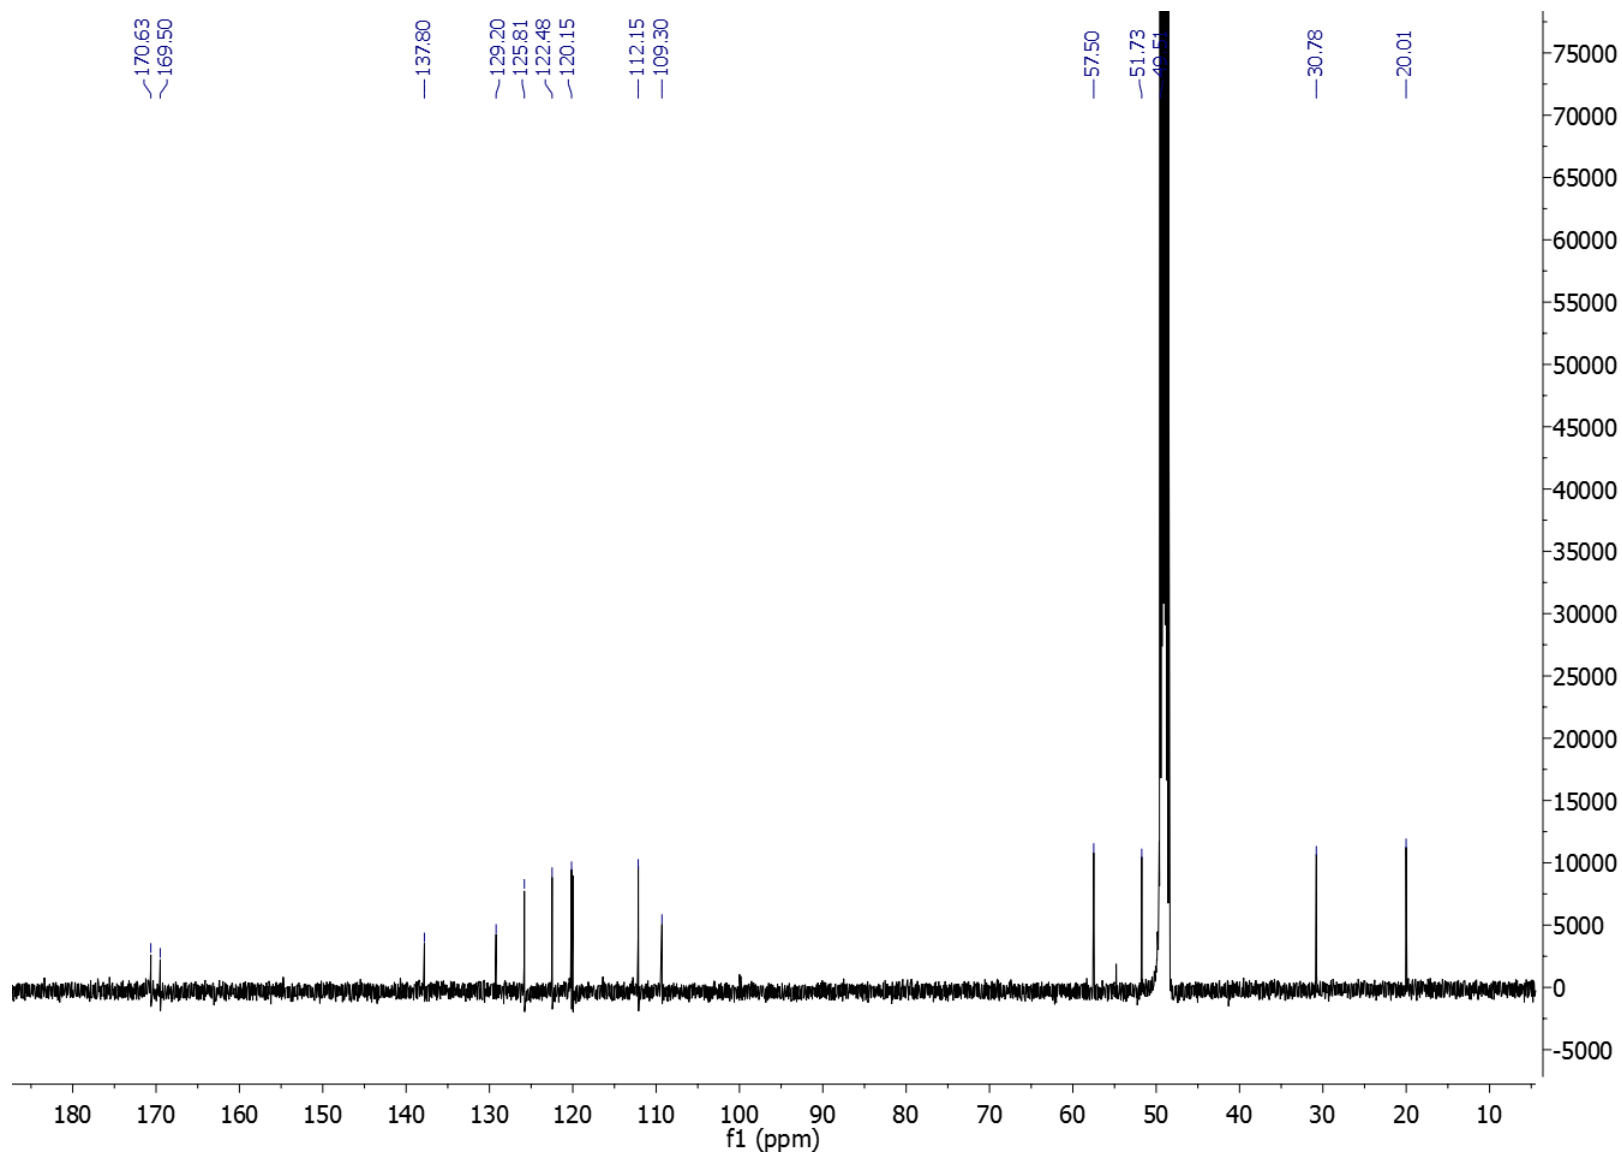

Figure S20.  $^{13}\text{C}$  NMR spectrum of cyclo-L-Trp-L-Ala (10) in  $\text{CD}_3\text{OD}$  at 125 MHz.

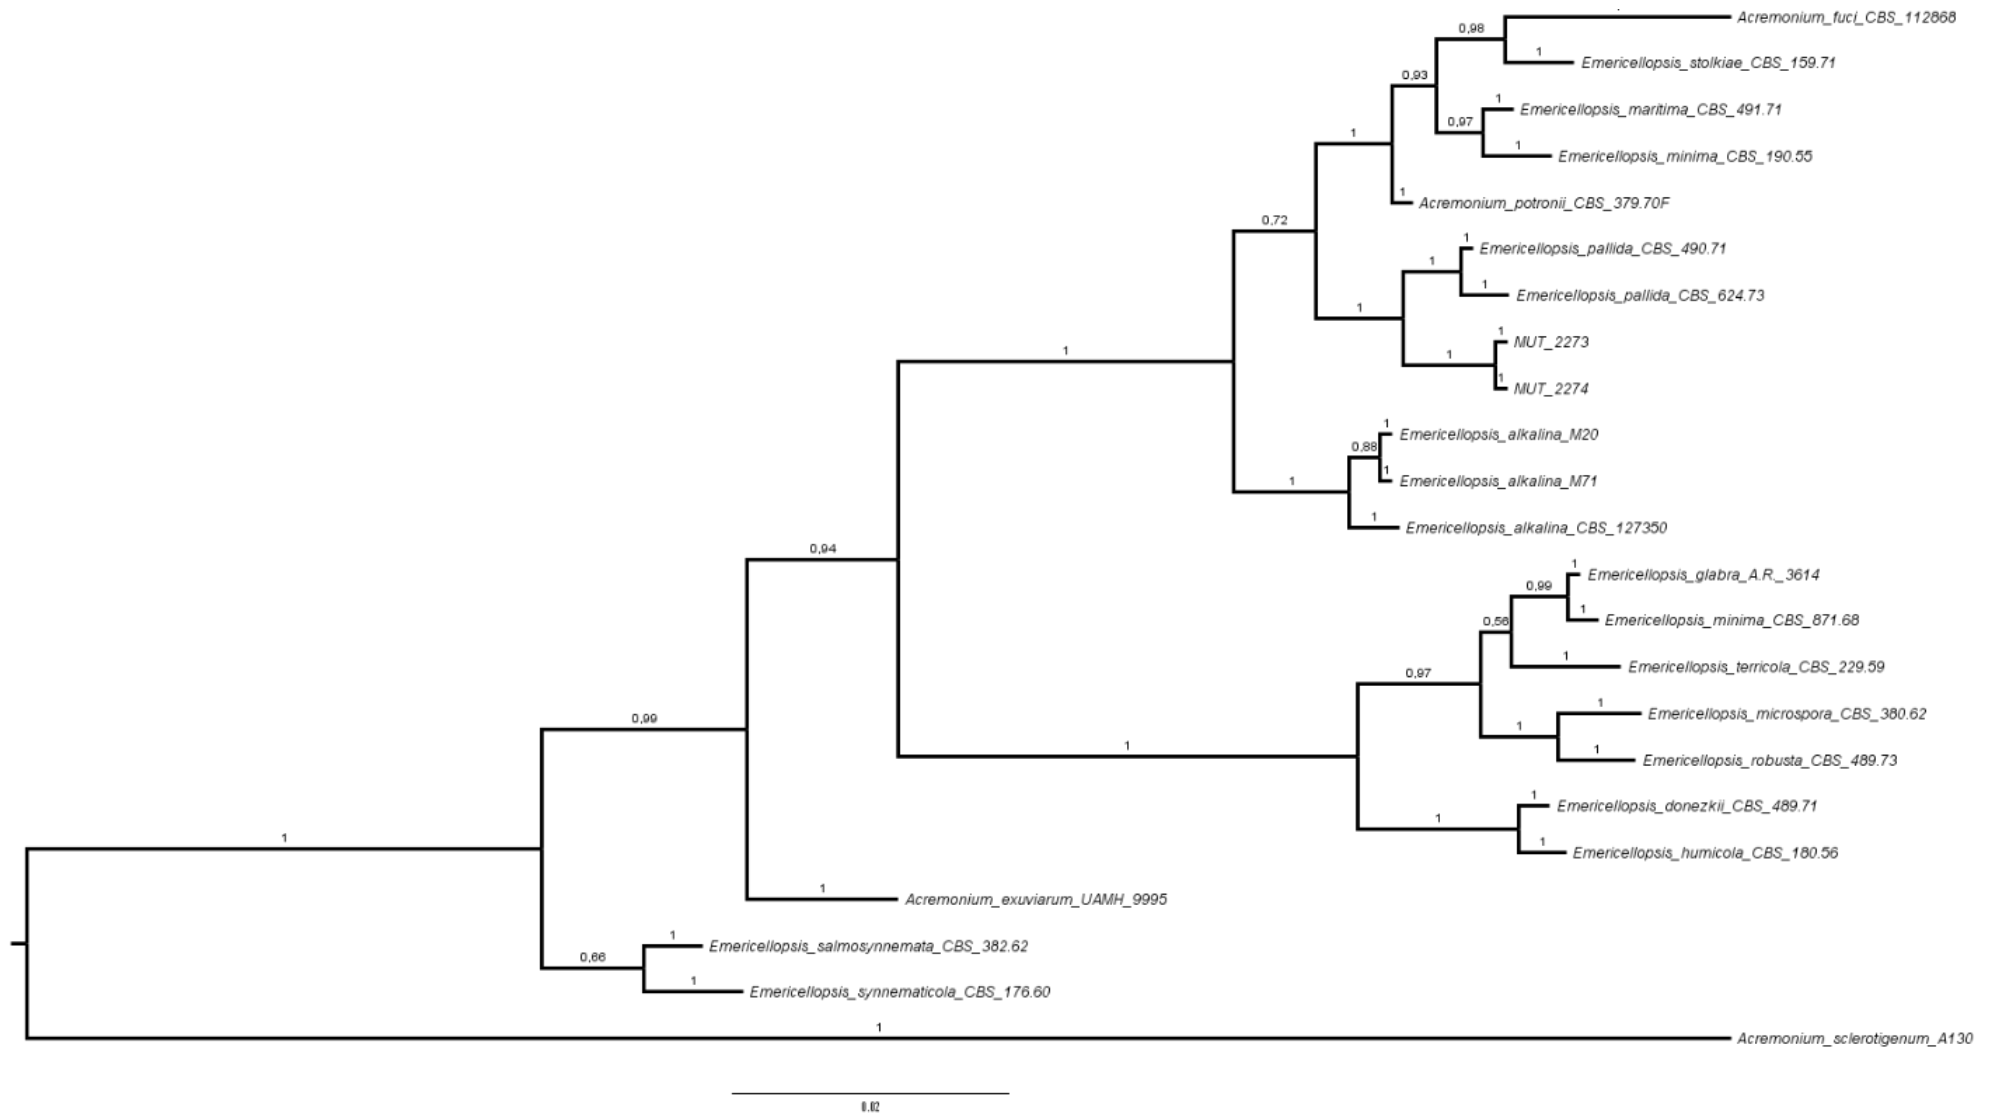

**Figure S21.** Bayesian phylogram of the genus *Emericellopsis* based on a combined dataset of ITS and beta tubulin partial sequences. MUT 2273 and MUT 2274 were identified as *Emericellopsis pallida*. Branch numbers indicate BPP values.

**Table S4.** Effect of different growth conditions on the HPLC-UV 280 nm chemical fingerprint of fungi, expressed as classes 1, 2, 3 and 4 at the increasing of the metabolic diversity. Exclusive peaks of each condition indicated in parenthesis. The changing in colours from dark to light blue and white indicated the increasing of the metabolic diversity.

| MUT code | Taxa                                      | Pure culture |       |       |       |       |       | Co-culture |       |       |       |       |       |
|----------|-------------------------------------------|--------------|-------|-------|-------|-------|-------|------------|-------|-------|-------|-------|-------|
|          |                                           | WH           | WHS   | PDA   | PDAS  | GA    | GAS   | WH         | WHS   | PDA   | PDAS  | GA    | GAS   |
| 2288     | <i>Ceriporia lacerata</i>                 | 2            | 1     | 1     | 1     | 1     | 1     | 1 (1)      | 1     | 1     | 1     | 1     | 1     |
| 2307     | <i>Cladosporium allicinum</i>             | 2 (2)        | 2     | 2 (2) | 2     | 2     | 1     | 1          | 1     | 2 (1) | 2     | 2     | 1     |
| 2313     | <i>Cladosporium allicinum</i>             | 2 (2)        | 2 (1) | 2     | 2 (1) | 2     | 2     | 2 (2)      | 2     | 1     | 1     | 2     | 2     |
| 2314     | <i>Cladosporium cladosporioides</i>       | 3            | 2     | 2     | 2     | 1     | 1     | 2          | 1 (1) | 2     | 2     | 1 (3) | 1     |
| 2315     | <i>Cladosporium pseudocladosporioides</i> | 2 (1)        | 1     | 2 (1) | 1 (2) | 2     | 2     | 1          | 2     | 2 (1) | 2     | 2 (2) | 1     |
| 2282     | <i>Coprinellus</i> sp.                    | 2 (1)        | 1 (1) | 1     | 1 (1) | 1     | 1     | 1          | 1     | 1     | 1     | 1     | 1     |
| 2332     | <i>Coprinellus</i> sp.                    | 2            | 1 (1) | 1     | 1     | 1     | 1     | 1          | 1 (1) | 1 (1) | 2     | 1     | 1     |
| 2273     | <i>Emericellopsis pallida</i>             | 2            | 2     | 4 (1) | 3     | 2     | 1     | 1 (2)      | 1 (1) | 3 (3) | 3     | 1     | 1     |
| 2274     | <i>Emericellopsis pallida</i>             | 1 (1)        | 1 (1) | 2     | 1     | 1     | 1     | 1          | 1 (1) | 2     | 1     | 1 (2) | 1     |
| 2316     | <i>Eurotium chevalieri</i>                | 4            | 4 (1) | 4 (1) | 4 (4) | 1     | 1     | 4          | 4 (2) | 4 (3) | 4     | 1 (1) | 1 (1) |
| 2334     | <i>Euthypella scoparia</i>                | 2 (2)        | 1 (1) | 1     | 1     | 1     | 1 (1) | 1 (3)      | 1     | 1     | 1 (1) | 1     | 1     |
| 2317     | <i>Fusarium solani</i>                    | 1            | 1     | 4     | 2     | 2     | 1     | 1          | 1     | 3     | 2     | 2     | 1     |
| 2321     | <i>Penicillium chrysogenum</i>            | 1            | 2     | 2     | 4     | 1 (1) | 1     | 3          | 2     | 4     | 3     | 1     | 1     |
| 2328     | <i>Penicillium oxalicum</i>               | 4            | 3 (1) | 3     | 3     | 2     | 2     | 3 (1)      | 4 (2) | 4     | 3 (1) | 1     | 1     |
| 2322     | <i>Penicillium paneum</i>                 | 2 (1)        | 2     | 2     | 3     | 1     | 1     | 2          | 2     | 3     | 3     | 2     | 1     |
| 2326     | <i>Penicillium paneum</i>                 | 2            | 2     | 2 (2) | 2     | 1     | 1     | 2          | 2     | 2     | 2     | 1     | 1     |
| 2331     | <i>Psathyrella candolleana</i>            | 2 (2)        | 1     | 1     | 1     | 1     | 1     | 2          | 2     | 3     | 1     | 1 (1) | 1     |
| 2415     | <i>Rhodotorula mucillaginosa</i>          | 2            | 2     | 1 (1) | 1 (1) | 1     | 1     | 1          | 2     | 1     | 1     | 1     | 1     |
| 2413     | <i>Tolypocladium cylindrosporium</i>      | 1 (1)        | 2 (1) | 2     | 2     | 2     | 2     | 2          | 2 (1) | 2     | 2 (1) | 1     | 1     |
| 2410     | <i>Tolypocladium cylindrosporium</i>      | 3 (1)        | 2 (2) | 2 (2) | 1 (1) | 2     | 2     | 3          | 2     | 1     | 2     | 2 (1) | 1     |

**Table S5.** Effect of different growth conditions on the development of the fungus (-, +, ++, +++); production of exudates (*e*), soluble pigments (*s*) and high sporulation (*h*); fungal-bacteria interaction as antagonistic response (*a*), predominance of the fungus (*p*) or complete inhibition of the bacterial growth (*n*). The changing in colours from dark to light blue and white, underlined the increasing of growth classes.

| MUT code | Taxa                                      | Pure culture           |                     |                     |                     |                     |                  | Co-culture             |                        |                     |                        |                    |                 |
|----------|-------------------------------------------|------------------------|---------------------|---------------------|---------------------|---------------------|------------------|------------------------|------------------------|---------------------|------------------------|--------------------|-----------------|
|          |                                           | WH                     | WHS                 | PDA                 | PDAS                | GA                  | GAS              | WH                     | WHS                    | PDA                 | PDAS                   | GA                 | GAS             |
| 2288     | <i>Ceriporia lacerata</i>                 | +++ ( <i>e, s</i> )    | ++                  | +++                 | +++                 | +++                 | +++              | +++ ( <i>e, s, p</i> ) | +++                    | +++ ( <i>p</i> )    | +++ ( <i>n</i> )       | +++                | ++              |
| 2307     | <i>Cladosporium allicinum</i>             | +++ ( <i>h</i> )       | +++ ( <i>h</i> )    | +++ ( <i>h</i> )    | +++ ( <i>h</i> )    | ++ ( <i>h</i> )     | ++               | ++ ( <i>h, a</i> )     | ++ ( <i>h, a</i> )     | ++ ( <i>h, a</i> )  | +++ ( <i>h, p</i> )    | + ( <i>h</i> )     | +               |
| 2313     | <i>Cladosporium allicinum</i>             | +++ ( <i>h</i> )       | +++ ( <i>h</i> )    | +++ ( <i>h</i> )    | +++ ( <i>h</i> )    | ++ ( <i>h</i> )     | +                | +++ ( <i>h, a</i> )    | +++ ( <i>h, a</i> )    | +++ ( <i>h, a</i> ) | +++ ( <i>h, a</i> )    | ++ ( <i>h</i> )    | +               |
| 2314     | <i>Cladosporium cladosporioides</i>       | +++ ( <i>h</i> )       | +++ ( <i>h</i> )    | +++ ( <i>h</i> )    | +++ ( <i>h</i> )    | +++ ( <i>h</i> )    | ++               | +++ ( <i>h, a</i> )    | +++ ( <i>h, a</i> )    | +++ ( <i>h, a</i> ) | +++ ( <i>h, p</i> )    | ++ ( <i>h</i> )    | ++              |
| 2315     | <i>Cladosporium pseudocladosporioides</i> | +++ ( <i>h</i> )       | +++ ( <i>h</i> )    | +++ ( <i>h</i> )    | +++ ( <i>h</i> )    | ++ ( <i>h</i> )     | +                | +++ ( <i>h, a</i> )    | +++ ( <i>h, a</i> )    | +++ ( <i>h</i> )    | +++ ( <i>h, n</i> )    | + ( <i>h</i> )     | +               |
| 2282     | <i>Coprinellus</i> sp.                    | +++                    | +++                 | +++                 | +++                 | +++                 | +                | +++ ( <i>p</i> )       | ++                     | +++ ( <i>p</i> )    | ++                     | ++                 | +               |
| 2332     | <i>Coprinellus</i> sp.                    | +++                    | ++                  | +++                 | +++                 | +++                 | -                | ++ ( <i>p</i> )        | +                      | +++ ( <i>p</i> )    | ++                     | +                  | +               |
| 2273     | <i>Emericellopsis pallida</i>             | +++                    | +++                 | +++                 | +++                 | ++                  | +++              | +++ ( <i>a</i> )       | +++                    | +++ ( <i>a</i> )    | +++                    | ++                 | ++              |
| 2274     | <i>Emericellopsis pallida</i>             | +++                    | +++                 | +++                 | +++                 | +++                 | +++              | +++ ( <i>a</i> )       | +++ ( <i>p</i> )       | +++ ( <i>a</i> )    | +++ ( <i>p</i> )       | ++                 | ++              |
| 2316     | <i>Eurotium chevalieri</i>                | +++ ( <i>e, h, s</i> ) | +++ ( <i>h, s</i> ) | +++ ( <i>h, s</i> ) | +++ ( <i>h, s</i> ) | +                   | ++               | ++ ( <i>e, h, s</i> )  | +++ ( <i>h, s, a</i> ) | ++ ( <i>h, s</i> )  | +++ ( <i>h, s, n</i> ) | +                  | ++              |
| 2334     | <i>Eutypella scoparia</i>                 | +++                    | +++                 | +++                 | +++                 | ++                  | ++               | +++                    | +++                    | +++                 | ++                     | ++                 | -               |
| 2317     | <i>Fusarium solani</i>                    | +++ ( <i>s</i> )       | +++                 | +++ ( <i>s</i> )    | +++                 | +++                 | +++              | +++ ( <i>s</i> )       | +++ ( <i>p</i> )       | +++ ( <i>s, p</i> ) | +++ ( <i>p</i> )       | +++                | +++             |
| 2321     | <i>Penicillium chrysogenum</i>            | +++ ( <i>h, s</i> )    | +++ ( <i>h, s</i> ) | +++ ( <i>h</i> )    | +++ ( <i>h</i> )    | +++ ( <i>h, s</i> ) | +++ ( <i>h</i> ) | +++ ( <i>h, s, a</i> ) | +++ ( <i>h, s, a</i> ) | +++ ( <i>h</i> )    | +++ ( <i>h, n</i> )    | ++ ( <i>h, s</i> ) | ++ ( <i>h</i> ) |
| 2328     | <i>Penicillium oxalicum</i>               | +++ ( <i>h</i> )       | +++ ( <i>h</i> )    | +++ ( <i>h</i> )    | +++ ( <i>h</i> )    | ++                  | ++               | +++ ( <i>h, p</i> )    | +++ ( <i>h, p</i> )    | +++ ( <i>h, p</i> ) | +++ ( <i>h, p</i> )    | +++                | +++             |
| 2322     | <i>Penicillium paneum</i>                 | +++                    | +++                 | +++ ( <i>h</i> )    | +++ ( <i>h</i> )    | ++                  | +                | +++ ( <i>a</i> )       | +++ ( <i>a</i> )       | +++ ( <i>h, p</i> ) | +++ ( <i>h, p</i> )    | +++                | +               |
| 2326     | <i>Penicillium paneum</i>                 | +++                    | +++                 | +++ ( <i>h</i> )    | +++ ( <i>h</i> )    | +++                 | ++               | +++ ( <i>a</i> )       | +++ ( <i>a</i> )       | +++ ( <i>h</i> )    | +++ ( <i>h, n</i> )    | +++                | +               |
| 2331     | <i>Psathyrella candolleana</i>            | +++                    | +                   | +++                 | -                   | +++                 | -                | ++ ( <i>a</i> )        | +                      | +++ ( <i>a</i> )    | -                      | ++                 | -               |
| 2415     | <i>Rhodotorula mucillaginosa</i>          | +++                    | +++                 | +++                 | +++                 | +                   | +                | +++                    | +++                    | +++                 | +++                    | -                  | +               |
| 2413     | <i>Tolypocladium cylindrosporum</i>       | +++                    | +++                 | +++                 | +++                 | +++                 | +++              | +++ ( <i>a</i> )       | +++ ( <i>a</i> )       | +++                 | +++                    | ++                 | ++              |
| 2410     | <i>Tolypocladium cylindrosporum</i>       | +++                    | +++                 | ++                  | ++                  | ++                  | +                | ++                     | ++                     | ++                  | ++                     | +                  | +               |
